# Supplementary material for: Factors associated with health literacy in multimorbid patients in primary care: a cross-sectional study in Switzerland
Source: PubMed Central journal article supplement — BMJ Open. 2018 Feb 13;8(2):e018281. doi: 10.1136/bmjopen-2017-018281 (PMC5829773; doi:10.1136/bmjopen-2017-018281), 2018-02-13
Supplement: bmjopen-2017-018281.draft_revisions.pdf [file bmjopen-2017-018281.draft_revisions.pdf]

# BMJ Open

BMJ Open is committed to open peer review. As part of this commitment we make the peer review history of every article we publish publicly available.

When an article is published we post the peer reviewers' comments and the authors' responses online. We also post the versions of the paper that were used during peer review. These are the versions that the peer review comments apply to.

The versions of the paper that follow are the versions that were submitted during the peer review process. They are not the versions of record or the final published versions. They should not be cited or distributed as the published version of this manuscript.

BMJ Open is an open access journal and the full, final, typeset and author-corrected version of record of the manuscript is available on our site with no access controls, subscription charges or pay-per-view fees (<http://bmjopen.bmj.com>).

If you have any questions on BMJ Open's open peer review process please email [editorial.bmjopen@bmj.com](mailto:editorial.bmjopen@bmj.com)

# BMJ Open

## Predictors of health literacy in multimorbid patients in primary care: a cross sectional study in Switzerland

|                               |                                                                                                                                                                                                                                                                                                                                                                                                                                                                                                                                                                                                                                                                                                                                                                                                                                                                                     |
|-------------------------------|-------------------------------------------------------------------------------------------------------------------------------------------------------------------------------------------------------------------------------------------------------------------------------------------------------------------------------------------------------------------------------------------------------------------------------------------------------------------------------------------------------------------------------------------------------------------------------------------------------------------------------------------------------------------------------------------------------------------------------------------------------------------------------------------------------------------------------------------------------------------------------------|
| Journal:                      | <i>BMJ Open</i>                                                                                                                                                                                                                                                                                                                                                                                                                                                                                                                                                                                                                                                                                                                                                                                                                                                                     |
| Manuscript ID                 | bmjopen-2017-018281                                                                                                                                                                                                                                                                                                                                                                                                                                                                                                                                                                                                                                                                                                                                                                                                                                                                 |
| Article Type:                 | Research                                                                                                                                                                                                                                                                                                                                                                                                                                                                                                                                                                                                                                                                                                                                                                                                                                                                            |
| Date Submitted by the Author: | 26-Jun-2017                                                                                                                                                                                                                                                                                                                                                                                                                                                                                                                                                                                                                                                                                                                                                                                                                                                                         |
| Complete List of Authors:     | N'GORAN, A. Alexandra; Policlinique médicale universitaire, Institut de médecine de famille;<br>Pasquier, Jérôme; Institute of Social and Preventive Medicine, Lausanne University Hospital, Lausanne, Switzerland,<br>Deruaz-Luyet, Anouk; University of Lausanne, Institute of Family Medicine Burnand, Bernard; CHUV, Institute of Social and Preventive Medicine Haller, Dagmar; Primary Care Unit, Faculty of Medicine, University of Geneva<br>Neuner-Jehle, Stefan; Institute of Primary Care, University of Zurich, University Hospital of Zurich<br>Zeller, Andreas; Institute of Primary Health Care, University of Basel, Switzerland<br>Streit, Sven; Institute of Primary Health Care BIHAM,<br>Herzig, Lilli; University of Lausanne, Institute of General Medicine Bodenmann, Patrick; University of Lausanne, Departement of Ambulatory Care and Community Medicine |
| Keywords:                     | GENERAL MEDICINE (see Internal Medicine), PRIMARY CARE, PUBLIC HEALTH                                                                                                                                                                                                                                                                                                                                                                                                                                                                                                                                                                                                                                                                                                                                                                                                               |
|                               |                                                                                                                                                                                                                                                                                                                                                                                                                                                                                                                                                                                                                                                                                                                                                                                                                                                                                     |

SCHOLARONE™  
Manuscripts

1  
2  
3 **Predictors of health literacy in multimorbid patients in primary care: a cross sectional**  
4 **study in Switzerland.**  
5  
6

7  
8 *Running title:* Health literacy in multimorbid patients  
9

10  
11 Alexandra A. N’Goran\*<sup>1</sup>, MD, MPH; Jérôme Pasquier<sup>3</sup>, PhD; Anouk Déruaz-Luyet<sup>1</sup>, PhD;  
12  
13 Bernard Burnand<sup>3</sup>, MD, MPH; Dagmar M Haller<sup>4</sup>, MD, PhD; Stefan Neuner-Jehle<sup>5</sup>, MD, MPH;  
14  
15 Andreas Zeller<sup>6</sup>, MD, MSc; Sven Streit<sup>7</sup>, MD; Lilli Herzig<sup>#1</sup>, MD; and Patrick Bodenmann<sup>#2</sup>,  
16  
17 MD, MSc.  
18  
19

20  
21  
22 <sup>1</sup> Institute of Family Medicine, University of Lausanne, Switzerland.  
23

24  
25 <sup>2</sup> Department of Ambulatory Care and Community Medicine, Lausanne University Hospital,  
26  
27 Switzerland.  
28

29  
30  
31 <sup>3</sup> Institute of Social and Preventive Medicine, Lausanne University Hospital, Switzerland.  
32

33  
34 <sup>4</sup> Primary Care Unit, Faculty of Medicine, University of Geneva, Switzerland.  
35

36  
37 <sup>5</sup> Institute of Primary Care, University of Zurich, Switzerland.  
38

39  
40 <sup>6</sup> Centre for Primary Health Care, University of Basel, Switzerland.  
41

42  
43 <sup>7</sup> Institute of Primary Health Care (BIHAM), University of Bern, Switzerland.  
44

45  
46 <sup>#</sup>These authors contributed equally  
47

48  
49 **\*Corresponding author and guarantor:**  
50

51  
52 Alexandra A. N’Goran. MD, MPH  
53

54  
55 Institute of Family Medicine, University of Lausanne  
56  
57

1  
2  
3 Rue du Bugnon 44  
4  
5

6 1011 Lausanne  
7  
8

9 Switzerland  
10  
11

12 Phone: + 41 21 314 61 15 / Fax: +41 21 314 75 90  
13  
14

15 [alengoran@yahoo.fr](mailto:alengoran@yahoo.fr)  
16  
17  
18  
19  
20  
21

22 **Word count:** 3159 words  
23

24 **Number of tables:** 3  
25  
26

27 **Number of references:** 43  
28  
29  
30  
31  
32  
33  
34  
35  
36  
37  
38  
39  
40  
41  
42  
43  
44  
45  
46  
47  
48  
49  
50  
51  
52  
53  
54  
55  
56  
57  
58  
59  
60

## Abstract

**Objective:** To identify factors associated with health literacy in multimorbid patients.

**Design:** A nationwide cross-sectional study in Switzerland. Univariate and multivariate linear regressions were calculated to identify variables associated with health literacy. A multiple imputation approach was used to deal with missing values.

**Participants:** Multimorbid patients recruited in primary care settings (N=888), above 18 years old and suffering from at least three of the 75 chronic conditions on a predefined list.

**Main measures:** Health literacy was assessed using the European Health Literacy Survey project questionnaire (HLS-EU 6). This comprises six items, each with five possible responses (*very difficult* =1, *fairly difficult* =2, *fairly easy* =3, *very easy* =4, and *do not know* =5). The mean health literacy score (sum of answers/number of items) can be computed if at least five of the six items are completed. The score ranges from 1 to 4.

**Results:** The mean health literacy score (SD) was 2.9 (0.5). Multivariate analyses found significant associations between low health literacy scores and: treatment burden scores ( $\beta = -0.004$ , 95% CI: [-0.006; -0.002]); marital status, predominantly the divorced group ( $\beta = 0.136$ , 95% CI: [0.012; 0.260]); dimensions of the EQ5D3L quality of life assessment, i.e., for moderate problems with mobility ( $\beta = -0.086$ , 95% CI: [-0.157; -0.016]); and with moderate problems ( $\beta = -0.129$ , 95% CI: [-0.198; -0.060]) and severe problems with anxiety/depression ( $\beta = -0.343$ , 95% CI: [-0.500; -0.186]).

**Conclusions** Multimorbid patients with high treatment burden, problems with mobility, or problems with anxiety or depression, often also have low levels of health literacy. Primary care practitioners should therefore pay particular attention to these patients in their daily practice.

1  
2  
3 **Keywords:** Health literacy, Multimorbidity, Primary care, Chronic disease, Switzerland.  
4  
5

6 **Article summary**  
7

- 8  
9
- 10 • This national primary care study enabled the analysis of data from a sample of  
11 multimorbid patients  
12
  - 13 • The first study to assess health literacy in multimorbid patients in primary care settings  
14
  - 15 • Only multimorbid patients with at least three consulted GPs settings are assessed  
16
  - 17 • Causal relationships cannot be inferred due to the study design  
18
- 19  
20  
21  
22  
23  
24  
25  
26  
27  
28  
29  
30  
31  
32  
33  
34  
35  
36  
37  
38  
39  
40  
41  
42  
43  
44  
45  
46  
47  
48  
49  
50  
51  
52  
53  
54  
55  
56  
57  
58  
59  
60

## Introduction

Multimorbidity, defined as the occurrence of multiple chronic medical conditions in one individual (1-3), is a steadily increasing phenomenon due to population ageing (4, 5).

Multimorbid patients must face many challenges: more frequent and longer hospitalizations (6, 7), greater use of polypharmacy (causing adverse drug effects) (8, 9), higher expenditure on healthcare (10-12), and the use of a broader range of healthcare services (8, 10). Moreover, as the number of health professionals involved in treatment increases, the more likely patients will be faced with fragmented medical care due to conflicting instructions and care pathways. This makes piecing together and adhering to instructions even more testing and thus prevents patients from participating effectively in their own care (8, 10, 12). Facing all these challenges effectively requires good levels of health literacy. The U.S. Institute of Medicine defines health literacy as “the degree to which individuals have the capacity to obtain, process and understand basic health information and services needed to make appropriate health decisions” (13, 14). Health literacy includes a broad set of skills (i.e., reading, writing, numeracy, communication, and, increasingly, the use of digital technologies) needed to make appropriate health decisions and successfully navigate the healthcare system (15). Health literacy is recognized as an important determinant of health (16-18). Studies have shown that lower health literacy is associated with a lower mental and physical health status, adverse disease-specific outcomes, higher mortality, and more use of healthcare but less use of preventive care (17, 19). Consequently, governments, researchers, clinicians, and patients’ associations are paying ever more attention to research into health literacy (20).

Effective patient–clinician communication that ensures patients are able to understand the health information and treatment recommendations they receive and feel comfortable enough to ask

1  
2  
3 questions or admit when they do not understand something, is vital to the successful  
4  
5 management of a chronic illness (21). Healthcare providers should be conscious of their patients'  
6  
7 health literacy skills so as to ensure that health information is communicated effectively to help  
8  
9 manage long-term conditions. Additionally, health literacy is a prerequisite for patient activation  
10  
11 and shared decision making. Thus, identifying factors associated with low health literacy is an  
12  
13 important step towards devising effective engagement, prevention, and intervention strategies for  
14  
15 multimorbid patients in primary care (20). Studies have assessed health literacy in different  
16  
17 ways, for example, the relationships between health literacy and multimorbidity in primary care  
18  
19 settings, or the factors influencing health literacy among less well-educated young people and  
20  
21 their consequences (14, 17, 22, 23). However, to the best of our knowledge, no study has yet  
22  
23 assessed the factors of association between health literacy and multimorbid patients. To fill this  
24  
25 gap, the present study aimed to explore factors that might associate low health literacy and  
26  
27 multimorbid patients with at least three chronic conditions treated in primary care settings.  
28  
29  
30  
31  
32  
33  
34  
35  
36  
37  
38  
39  
40  
41  
42  
43  
44  
45  
46  
47  
48  
49  
50  
51  
52  
53  
54  
55  
56  
57  
58  
59  
60



## Methods

### *1. Participants and procedures*

We analyzed data (N = 888) from a national cross-sectional survey conducted in collaboration with Switzerland's five academic institutes of family medicine, between January and September 2015. The study was designed to assess multimorbidity in patients in a primary care setting. The detailed study protocol and dataset description have been published elsewhere (24).

A convenience sample of 100 general practitioners (GPs) randomly enrolled patients from their practices who consulted them during the study period. All multimorbid patients above 18 years old and suffering from at least three of the 75 chronic conditions on a predefined list were considered eligible (25) and signed a written consent to participate to the study. The study protocol (Protocol No 314/15) was approved by the Human Research Ethics Committee of the Canton Vaud, Switzerland.

### *2. Measures*

#### *2.1 Health literacy*

Health literacy was assessed using the validated six-item questionnaire from the European Health Literacy Survey project (HLS-EU 6) (26, 27). The HLS-EU was a Europe-wide project developed to gather data on health literacy (26). The six items for the survey instrument were selected from the full 47-question survey (HLS-EU 47) (26, 28). We used the shorter, validated questionnaire (HLS-EU-6) because the present study's main objective was to measure overall levels of health literacy in multimorbid patients, not to assess health literacy in detail. The HLS-

1  
2  
3 EU 6 scale consists of six items with five possible responses. Participants were asked to respond  
4 to the following questions. How easy or difficult is it for you to: (a) judge when you may need to  
5 get a second opinion from another doctor? (b) use information the doctor gives you to make  
6 decisions about your illness? (c) find information on how to manage mental health problems like  
7 stress or depression? (d) judge whether the information on health risks in the media is reliable?  
8 (e) find out about activities that are good for your mental wellbeing? and (f) understand  
9 information in the media on how to get healthier? The possible responses were as follows: *very*  
10 *difficult* = 1, *fairly difficult* = 2, *fairly easy* = 3, *very easy* = 4, and a fifth alternative for when  
11 participants did not answer or did not have a definite answer. This was labelled as *do not know*.  
12 All other values, including *do not know* answers, that were optional for personal interviews were  
13 coded as missing values. Patients' responses were considered incomplete if at least one of the six  
14 items was missing a response. The mean health literacy score (sum of answers/number of items)  
15 was computed if at least five of the six items had been completed, and the scores thus ranged  
16 from 1 to 4 (27).

## 2.2 Covariates

Demographic covariates included:

- 44 - age
- 45 - sex (female/male)
- 46 - marital status (single, married, divorced, or widowed)
- 47 - educational level (primary, secondary, and tertiary)
- 48 - number of chronic conditions
- 49 - number of drugs (0–4, 5–6, 7–9, or ≥ 10)

- 1
- 2
- 3 - number of medical visits in the last year
- 4
- 5 - number of hospitalizations in the last year
- 6
- 7
- 8 - Dipcare questionnaire for deprivation assessment, containing 16 items examining the
- 9
- 10 three dimensions of deprivation (material, social, and health), and validated for the Swiss
- 11
- 12 population and published elsewhere in detail (29)
- 13
- 14 - treatment burden questionnaire (TBQ), recently developed to produce a score for the
- 15
- 16 overall burden related to the treatment of chronic conditions (30); it consists of 13
- 17
- 18 questions to rate with an answer between 0 and 10, with 0 corresponding to *no burden*
- 19
- 20 and 10 to *a very important/considerable burden*
- 21
- 22
- 23
- 24 - nurse (yes/no)
- 25
- 26 - paramedical therapist grouped together physiotherapist and/or occupational therapist
- 27
- 28 (yes/no)
- 29
- 30
- 31 - homecare (yes/no)
- 32
- 33 - number of specialists involved in patient's care
- 34
- 35 - EQ5D3L composed of five dimensions of health (mobility, self-care, usual activities,
- 36
- 37 pain/discomfort, and anxiety/depression) and using a visual analogue scale
- 38
- 39
- 40 - the severity index (SI) derived from the cumulative illness rating scale (CIRS), a
- 41
- 42 validated questionnaire published elsewhere in detail (31). The SI, (32-34) was obtained
- 43
- 44 by dividing the total CIRS score by the number of categories with morbidities.
- 45
- 46
- 47
- 48

### 49 3. *Statistical analyses*

50

51

52 On collecting the questionnaires, the number of values missing from our variable of interest

53

54 (health literacy score) was considered too high (i.e. the health literacy score could not be

55

56

57

58

59

60

1  
2  
3 computed in full for 577 participants) to reasonably consider each participant's case in its  
4  
5 entirety for analysis. We first considered computing the health literacy scores for all participants  
6  
7 with at least five non-missing items. However, even then, the number of missing scores remained  
8  
9 too high (377 participants), and comparisons between complete and the incomplete sets of  
10  
11 responses showed significant differences in several covariates (data not shown). We therefore  
12  
13 opted for the imputation of the values missing from the health literacy items and demographic  
14  
15 covariates by using the multiple imputation approach developed by Rubin (35).  
16  
17  
18  
19

20 We calculated means and standard deviations for quantitative variables, and frequencies and  
21  
22 proportions for categorical ones. Univariate and multivariate linear regressions were carried out  
23  
24 to identify predictors of health literacy. Using sensitivity analysis, we checked whether a model  
25  
26 without imputations would produce the same results as the model with multiple imputations:  
27  
28 analysis with and without imputation gave similar results.  
29  
30  
31

32 All analyses were performed using R software version 3.3.2, (36) and the mice package version  
33  
34 2.29, (37).  
35  
36  
37  
38  
39  
40  
41  
42  
43  
44  
45  
46  
47  
48  
49  
50  
51  
52  
53  
54  
55  
56  
57  
58  
59  
60

## Results

### *Descriptive analyses*

Cases with at least one missing value among the six items were considered incomplete. The *do not know* alternative generated a lot of missing values (239, 18, 417, 168, 252, and 175 for questions (a) to (f), respectively), making the health literacy score incomputable for 577 patients. The mean age (SD) of the participants was 72.9 (12.0) years old; 52.0% were women. Almost half of the participants were married (49.0%), and 40.0% had a tertiary level of education. The mean (SD) number of chronic conditions was 7.20 (2.9), and the mean (SD) number of medical visits in the last year was 12.90 (8.7). The mean health literacy score (SD) of the participants was 2.9 (0.5). Descriptive statistics are summarized in Table 1.

*Insert table 1 about here*

In bivariate analyses with imputation, we found significant relationships between health literacy and almost all the covariates except for the number of chronic conditions, number of drugs, number of medical visits in the last year, number of hospitalizations in the last year, homecare, nurse, and severity index (Table 2).

*Insert table 2 about here*

The multivariate analyses showed significant relationships between health literacy and: the treatment burden score ( $\beta = -0.004$ , 95% CI: [-0.006; -0.002]); marital status, but particularly for the divorced group ( $\beta = 0.136$ , 95% CI: [0.012; 0.260]); dimensions of the EQ5D3L quality of

1  
2  
3 life assessment, i.e. moderate problems with mobility and moderate and severe problems with  
4 anxiety/depression ( $\beta = -0.086$ , 95% CI: [-0.157; -0.016]), ( $\beta = -0.129$ , 95% CI: [-0.198; -0.060]),  
5  
6 and ( $\beta = -0.343$ , 95% CI: [-0.500; -0.186]), respectively. Table 3 shows the results of these  
7  
8 multivariate analyses.  
9  
10  
11  
12  
13  
14

15 *Insert table 3 about here*  
16  
17  
18  
19  
20  
21  
22  
23  
24  
25  
26  
27  
28  
29  
30  
31  
32  
33  
34  
35  
36  
37  
38  
39  
40  
41  
42  
43  
44  
45  
46  
47  
48  
49  
50  
51  
52  
53  
54  
55  
56  
57  
58  
59  
60

## Discussion

The present study showed that the mean (SD) health literacy score in our multimorbid primary care patient sample was 2.9 (0.5). In multimorbid patients, a high treatment burden and effects on patients' quality of life due to problems with mobility and anxiety/depression were negatively associated with health literacy. Although several studies have assessed health literacy, to the best of our knowledge, little is known about which factors are associated with low health literacy in multimorbid patients.

The present study's main finding was that the treatment burden facing multimorbid primary care patients was negatively associated with health literacy. In other words, the higher the treatment burden found in multimorbid patients, the lower their health literacy. This could be explained by the fact that multimorbid patients facing a high treatment burden and several associated diseases at once are so concerned about simply coping with their care procedures and treatment that they do not have time to improve their literacy and truly understand those medical acts. This is a common result of polypharmacy, several different treatment procedures and care regimens, and numerous administrative procedures. When we look at all of these elements together, patients faced with the complex situation of a high treatment burden may well become confused: there are too many things happening at the same time for them to be able to understand and manage them effectively. They therefore have neither the time nor the energy to improve their health literacy from its initial low level. Moreover, low health literacy was found to be associated with a reduced ability to identify medication in adults with coronary heart disease (38), poor health outcomes (14, 19, 39), and a more significant use of healthcare (40). As these three factors can also be linked to multimorbidity and may have an impact on the overall treatment burden, this could explain the association between the treatment burden and low health literacy.

1  
2  
3 This finding is very interesting, and although the  $\beta$  coefficient is small, we believe that this result  
4 is clinically relevant and allows us to identify treatment burden as an element to take into  
5 account for potentially low literacy in multimorbid patients. It should be noted that due to the  
6 study's design, this result could also be seen from another angle, i.e., that low literacy is  
7 negatively associated with a high treatment burden. Indeed, individuals with low health literacy  
8 are usually less well educated and therefore belong to lower socioeconomic groups.  
9  
10 Multimorbidity is higher in these groups and patients in them are more likely to suffer from more  
11 severe diseases – this leads to a higher treatment burden.  
12  
13  
14  
15  
16  
17  
18  
19  
20  
21  
22

23 Another important finding was that patients whose quality of life had been altered by problems  
24 related to anxiety/depression or mobility were more likely to have low levels of health literacy.  
25  
26

27 One explanation for the association between problems of anxiety/depression and low health  
28 literacy could be that these syndromes can impair cognitive focus, energy, and patient  
29 motivation. They might also be expected to affect patients' motivation and ability (41) to seek  
30 out and understand information about their diseases and treatment, resulting in a lower level of  
31 health literacy, especially in the complex context of multimorbidity. We could suggest that  
32 anxious, depressed patients should expend their energies on dealing with their treatment  
33 difficulties and reduced quality of life rather than worrying about improving their level of health  
34 literacy. Moreover, anxiety and depression may well be higher when patients have to face up to  
35 more numerous health problems, especially in multimorbidity. This result is not concordant with  
36 the study by Green et al. (42), however, which found no association between limited health  
37 literacy and depression in patients treated with chronic hemodialysis, but this difference might be  
38 explained by the differences in the study populations and how health literacy was assessed.  
39  
40  
41  
42  
43  
44  
45  
46  
47  
48  
49  
50  
51  
52  
53  
54  
55  
56  
57  
58  
59  
60



1  
2  
3 Concerning the association between mobility problems and low health literacy, one explanation  
4 might be that patients with mobility problems are more dependent on their relatives. Their lack  
5 of physical energy may reduce their motivation and interest in searching out and understanding  
6 information about their health and how to manage their health concerns: their over-reliance on  
7 relatives results in a low level of health literacy. Thus, multimorbid patients with mobility  
8 problems would be less inclined to actively search for of health information and might have a  
9 tendency to somewhat give up their independence. Moreover, problems of mobility could  
10 exacerbate problems of anxiety/depression, resulting in combined effects and explanations for  
11 low levels of health literacy in multimorbid patients. However, we can only speculate as to  
12 whether there is any precise explanation of these associations and, due to its design, the study's  
13 findings could be interpreted the other way (i.e., that health literacy influences  
14 anxiety/depression).

15  
16  
17  
18  
19  
20  
21  
22  
23  
24  
25  
26  
27  
28  
29  
30  
31 The present study found no association between the health literacy of multimorbid primary care  
32 patients and their use of healthcare services, especially with regards to the number of  
33 consultations with their GP or the number of hospitalizations in the past year. This result agreed  
34 with the study by Vandenbosch et al. (40) who also found no significant associations between  
35 health literacy and the number of medical visits or hospitalizations. However, a study by Duong  
36 et al. (43) did find an association between health literacy and healthcare use. These results are  
37 inconsistent due to differences in the study populations (i.e. our study population was composed  
38 of multimorbid patients in primary care settings) and methodologies. Indeed, we suggest that  
39 health literacy in multimorbid patients is different from that in the general population and should  
40 be assessed differently. Further research should aim to clearly confirm or invalidate our results  
41 with multimorbid patients.

## Strengths and limitations

This national primary care study enabled the analysis of data from a relatively representative sample of multimorbid patients suffering from at least three chronic conditions and enrolled in GPs' practices across Switzerland. Although several studies have previously assessed health literacy, to the best of our knowledge, this was the first to have assessed factors associated with health literacy in multimorbid patients in a primary care setting.

However, this study had some limitations. First, the beta coefficients were small, making clinical interpretation difficult, despite the fact that the study gives an overall view of the factors associated with health literacy. Further studies should be done to confirm these trends.

Second, our sample might not be perfectly representative of all multimorbid patients. GPs only recruited patients who came to their practices and who were suffering from at least three chronic conditions from a list of 75 provided to them. The most impaired multimorbid patients, therefore, those with the most extensive mobility problems (i.e., those cared for via homecare visits, in nursing homes, or hospitalized) were not included (selection bias). Our results concerning the health literacy in multimorbid patients should thus be interpreted with caution, taking into consideration multimorbid patients who cannot attend GPs' practices or who have rare chronic conditions.

Third, due to the study's cross-sectional design, causal relationships cannot be inferred.

## Conclusion

The present study highlights the factors associated with health literacy in multimorbid patients. It provides useful information which could guide GPs in their daily practice and help them to pay

1  
2  
3 more attention to patients at risk of having low health literacy. With the knowledge that  
4  
5 multimorbidity increases the risks of poor health outcomes, it is particularly important to note  
6  
7 that low health literacy is associated with poor health outcomes too. Indeed, despite a greater use  
8  
9 of healthcare services, there is less use of preventive care. Even though, with the current state of  
10  
11 knowledge, we cannot demonstrate causal relationships between multimorbidity and the  
12  
13 treatment burden or quality of life, GPs should carefully weigh up how best to transmit clinical  
14  
15 information to their patients in an understandable manner so that they may comprehend it  
16  
17 without too much complexity. Moreover, with ageing populations and the likely increase in the  
18  
19 numbers of multimorbid patients, it will be important to develop new strategies to improve their  
20  
21 health literacy and, in so doing, improve their treatment and patient management in primary care  
22  
23 settings.  
24  
25  
26  
27  
28

### 29 **Funding**

30  
31  
32 This work was supported by Swiss University Conference project P10, which granted funding to  
33  
34 reinforce teaching and research in Primary Care in Switzerland. Within the framework of this  
35  
36 financial support, Switzerland's five university institutes of family medicine (in Basel, Bern,  
37  
38 Geneva, Lausanne, and Zurich) collaborate as the Swiss Academy of Family Medicine  
39  
40 (SAFMED). The funding source had no role in study design, data collection, analysis or  
41  
42 interpretation, nor in the preparation of the manuscript and the decision to submit the paper for  
43  
44 publication.  
45  
46  
47  
48

### 49 **Acknowledgement**

50  
51  
52 The authors are grateful to all the GPs and patients for their extensive participation.  
53  
54  
55  
56  
57  
58  
59  
60

**Conflict of interest:**

The authors declare no conflicts of interest.

**Authors' contributions**

AAN, ADL, BB, DMH, AZ, LH, and PB developed the protocol for the MMFM study. LH, AZ, and DMH ensured the recruitment of participating GPs. AAN was primarily responsible for planning the analysis and drafting the manuscript. JP was responsible for the analyses. PB, JP, and LH helped to improve the manuscript during this process. BB, AD, DMH, SS, SNJ, AZ, PB, and LH made contributions to the interpretation of the findings and the content of the final manuscript. All authors read and approved the final manuscript.

**Data Sharing Statement**

Data are available at family medicine institute of Lausanne.

## REFERENCES

1. Uijen AA, van de Lisdonk EH. Multimorbidity in primary care: prevalence and trend over the last 20 years. *The European journal of general practice*. 2008;14(sup1):28-32.
2. Valderas JM, Starfield B, Sibbald B, Salisbury C, Roland M. Defining comorbidity: implications for understanding health and health services. *The Annals of Family Medicine*. 2009;7(4):357-63.
3. Van den Akker M, Buntinx F, Metsemakers JF, Roos S, Knottnerus JA. Multimorbidity in general practice: prevalence, incidence, and determinants of co-occurring chronic and recurrent diseases. *J. Clin. Epidemiol*. 1998;51(5):367-75.
4. Goodman RA. Defining and measuring chronic conditions: imperatives for research, policy, program, and practice. *Preventing chronic disease*. 2013;10.
5. Heyworth IT, Hazell ML, Linehan MF, Frank TL. How do common chronic conditions affect health-related quality of life? *Br J Gen Pract*. 2009;59(568):e353-e8.
6. Condelius A, Edberg A-K, Jakobsson U, Hallberg IR. Hospital admissions among people 65+ related to multimorbidity, municipal and outpatient care. *Archives of gerontology and geriatrics*. 2008;46(1):41-55.
7. Smith SM, O'Dowd T. Chronic diseases: what happens when they come in multiples? : *British Journal of General Practice*; 2007.
8. Vogeli C, Shields AE, Lee TA, Gibson TB, Marder WD, Weiss KB, et al. Multiple chronic conditions: prevalence, health consequences, and implications for quality, care management, and costs. *Journal of general internal medicine*. 2007;22(3):391-5.

- 1  
2  
3 9. Wehling M. Multimorbidity and polypharmacy: how to reduce the harmful drug load and  
4 yet add needed drugs in the elderly? Proposal of a new drug classification: fit for the aged.  
5  
6 Journal of the American Geriatrics Society. 2009;57(3):560-1.  
7
- 8  
9  
10 10. Bayliss EA, Edwards AE, Steiner JF, Main DS. Processes of care desired by elderly  
11 patients with multimorbidities. Family Practice. 2008;25(4):287-93.  
12
- 13  
14 11. Bodenheimer T, Fernandez A. High and rising health care costs. Part 4: can costs be  
15 controlled while preserving quality? Annals of Internal Medicine. 2005;143(1):26-31.  
16
- 17  
18 12. Taylor AW, Price K, Gill TK, Adams R, Pilkington R, Carrangis N, et al.  
19  
20 Multimorbidity-not just an older person's issue. Results from an Australian biomedical study.  
21  
22 BMC public health. 2010;10(1):718.  
23
- 24  
25 13. Kindig DA, Panzer AM, Nielsen-Bohlman L. Health literacy: a prescription to end  
26  
27 confusion: National Academies Press; 2004.  
28
- 29  
30 14. Hudon C, Fortin M, Poitras M-E, Almirall J. The relationship between literacy and  
31  
32 multimorbidity in a primary care setting. BMC family practice. 2012;13(1):33.  
33
- 34  
35 15. Hersh L, Salzman B, Snyderman D. Health Literacy in Primary Care Practice. American  
36  
37 family physician. 2015;92(2).  
38
- 39  
40 16. Bennett IM, Chen J, Soroui JS, White S. The contribution of health literacy to disparities  
41  
42 in self-rated health status and preventive health behaviors in older adults. The Annals of Family  
43  
44 Medicine. 2009;7(3):204-11.  
45
- 46  
47 17. van der Heide I, Uiters E, Sørensen K, Röthlin F, Pelikan J, Rademakers J, et al. Health  
48  
49 literacy in Europe: the development and validation of health literacy prediction models. The  
50  
51 European Journal of Public Health. 2016;26(6):906-11.  
52  
53  
54  
55  
56  
57  
58  
59  
60

- 1  
2  
3 18. van der Heide I, Wang J, Droomers M, Spreeuwenberg P, Rademakers J, Uiters E. The  
4 relationship between health, education, and health literacy: results from the Dutch Adult Literacy  
5 and Life Skills Survey. *Journal of health communication*. 2013;18(sup1):172-84.  
6  
7
- 8  
9  
10 19. Berkman ND, Sheridan SL, Donahue KE, Halpern DJ, Crotty K. Low health literacy and  
11 health outcomes: an updated systematic review. *Annals of internal medicine*. 2011;155(2):97-  
12  
13 107.  
14
- 15  
16 20. Friis K, Lasgaard M, Osborne RH, Maindal HT. Gaps in understanding health and  
17 engagement with healthcare providers across common long-term conditions: a population survey  
18 of health literacy in 29 473 Danish citizens. *BMJ open*. 2016;6(1):e009627.  
19  
20  
21
- 22  
23 21. Barrett SE, Puryear JS. Health literacy: improving quality of care in primary care  
24 settings. *Journal of Health Care for the Poor and Underserved*. 2006;17(4):690-7.  
25  
26  
27
- 28  
29 22. Quenzel G, Schaeffer D, Messer M, Vogt D. Health literacy among less well-educated  
30 young people: Influencing factors and consequences. *Bundesgesundheitsblatt,*  
31  
32 *Gesundheitsforschung, Gesundheitsschutz*. 2015;58(9):951-7.  
33  
34
- 35  
36 23. Sørensen K, Pelikan JM, Röthlin F, Ganahl K, Slonska Z, Doyle G, et al. Health literacy  
37 in Europe: comparative results of the European health literacy survey (HLS-EU). *The European*  
38  
39 *Journal of Public Health*. 2015:ckv043.  
40  
41
- 42  
43 24. Déruaz-Luyet A, N'Goran AA, Tandjung R, Frey P, Zeller A, Haller DM, et al.  
44 Multimorbidity in primary care: protocol of a national cross-sectional study in Switzerland. *BMJ*  
45  
46 *open*. 2015;5(10):e009165.  
47  
48
- 49  
50 25. N'Goran AA, Blaser J, Deruaz-Luyet A, Senn N, Frey P, Haller DM, et al. From chronic  
51 conditions to relevance in multimorbidity: a four-step study in family medicine. *Family Practice*.  
52  
53 2016:cmw030.  
54  
55  
56  
57  
58  
59  
60

- 1  
2  
3 26. Consortium H-E. Comparative report of health literacy in eight EU member states. The  
4 European health literacy survey HLS-EU. 2012.  
5  
6
- 7 27. Pelikan J, Röthlin F, Ganahl K, Peer S, editors. Measuring comprehensive health literacy  
8 in general populations—the HLS-EU instruments. Presentation at the Second International  
9 Conference of Health Literacy and Health Promotion; 2014.  
10  
11
- 12 28. Sørensen K, Van den Broucke S, Pelikan JM, Fullam J, Doyle G, Slonska Z, et al.  
13 Measuring health literacy in populations: illuminating the design and development process of the  
14 European Health Literacy Survey Questionnaire (HLS-EU-Q). *BMC public health*.  
15 2013;13(1):948.  
16  
17
- 18 29. Vaucher P, Bischoff T, Diserens E-A, Herzig L, Meystre-Agostoni G, Panese F, et al.  
19 Detecting and measuring deprivation in primary care: development, reliability and validity of a  
20 self-reported questionnaire: the DiPCare-Q. *BMJ open*. 2012;2(1):e000692.  
21  
22
- 23 30. Tran V-T, Montori VM, Eton DT, Baruch D, Falissard B, Ravaud P. Development and  
24 description of measurement properties of an instrument to assess treatment burden among  
25 patients with multiple chronic conditions. *BMC medicine*. 2012;10(1):68.  
26  
27
- 28 31. Linn BS, LINN MW, Gurel L. Cumulative illness rating scale. *Journal of the American*  
29 *Geriatrics Society*. 1968;16(5):622-6.  
30  
31
- 32 32. Brett T, Arnold-Reed DE, Popescu A, Soliman B, Balsara MK, Fine H, et al.  
33 Multimorbidity in patients attending 2 Australian primary care practices. *The Annals of Family*  
34 *Medicine*. 2013;11(6):535-42.  
35  
36
- 37 33. Miller M, Towers A. A manual of guidelines for scoring the Cumulative Illness Rating  
38 Scale for Geriatrics (CIRS-G). Pittsburgh, PA: University of Pittsburgh. 1991.  
39  
40  
41  
42  
43  
44  
45  
46  
47  
48  
49  
50  
51  
52  
53  
54  
55  
56  
57  
58  
59  
60



- 1  
2  
3 34. Miller MD, Paradis CF, Houck PR, Mazumdar S, Stack JA, Rifai AH, et al. Rating  
4 chronic medical illness burden in geropsychiatric practice and research: application of the  
5 Cumulative Illness Rating Scale. *Psychiatry research*. 1992;41(3):237-48.  
6  
7  
8  
9  
10 35. Rubin R. *Multiple imputation for nonresponse in surveys* (J Wiley & Sons, New York,  
11 NY). 1987.  
12  
13  
14 36. RCore T. R: A language and environment for statistical computing. R Foundation for  
15 Statistical Computing, Vienna, Austria. Online: <http://www.R-project.org>. 2013.  
16  
17  
18 37. Buuren S, Groothuis-Oudshoorn K. mice: Multivariate imputation by chained equations  
19 in R. *Journal of statistical software*. 2011;45(3).  
20  
21  
22  
23 38. Kripalani S, Henderson LE, Chiu EY, Robertson R, Kolm P, Jacobson TA. Predictors of  
24 Medication Self-management Skill in a Low-literacy Population. *Journal of general internal*  
25 *medicine*. 2006;21(8):852-6.  
26  
27  
28  
29 39. Baker DW, Parker RM, Williams MV, Clark WS, Nurss J. The relationship of patient  
30 reading ability to self-reported health and use of health services. *American journal of public*  
31 *health*. 1997;87(6):1027-30.  
32  
33  
34  
35 40. Vandenbosch J, Van den Broucke S, Vancorenland S, Avalosse H, Verniest R, Callens  
36 M. Health literacy and the use of healthcare services in Belgium. *Journal of epidemiology and*  
37 *community health*. 2016;jech-2015-206910.  
38  
39  
40  
41 41. DiMatteo MR, Lepper HS, Croghan TW. Depression is a risk factor for noncompliance  
42 with medical treatment: meta-analysis of the effects of anxiety and depression on patient  
43 adherence. *Archives of internal medicine*. 2000;160(14):2101-7.  
44  
45  
46  
47  
48  
49  
50  
51  
52  
53  
54  
55  
56  
57  
58  
59  
60

1  
2  
3 42. Green JA, Mor MK, Shields AM, Sevick MA, Palevsky PM, Fine MJ, et al. Prevalence  
4 and demographic and clinical associations of health literacy in patients on maintenance  
5  
6

7 hemodialysis. *Clinical Journal of the American Society of Nephrology*. 2011;6(6):1354-60.  
8

9  
10 43. Duong VT, Lin I-F, Sorensen K, Pelikan JM, Van Den Broucke S, Lin Y-C, et al. Health  
11 literacy in Taiwan: A population-based study. *Asia Pacific Journal of Public Health*.  
12

13  
14 2015;27(8):871-80.  
15  
16  
17  
18  
19  
20  
21  
22  
23  
24  
25  
26  
27  
28  
29  
30  
31  
32  
33  
34  
35  
36  
37  
38  
39  
40  
41  
42  
43  
44  
45  
46  
47  
48  
49  
50  
51  
52  
53  
54  
55  
56  
57  
58  
59  
60

For peer review only

Table 1: Descriptive statistics of the sample of multimorbid patients, N = 888.

| Variable                                             | mean <sup>‡</sup> | sd <sup>‡</sup> |
|------------------------------------------------------|-------------------|-----------------|
| Age                                                  | 72.93             | 12.00           |
| Health literacy score (577 missing values)           | 2.87              | 0.45            |
| Material deprivation score                           | 0.50              | 1.27            |
| Social deprivation score                             | 1.93              | 1.38            |
| Health deprivation score                             | 0.48              | 0.68            |
| Number of medical visits last year (1 missing value) | 12.90             | 8.70            |
| Number of hospitalizations (3 missing values)        | 0.54              | 0.99            |
| Number of chronic conditions (4 missing values)      | 7.20              | 2.86            |
| TBQ* score                                           | 26.77             | 18.60           |
| Number of specialists (141 missing values)           | 2.23              | 1.27            |
| Severity index                                       | 1.75              | 0.38            |
| Visual analogue scale (EQ5D3L)                       | 63.19             | 19.25           |
| Variable                                             | count             | prop            |
| <b>Sex</b>                                           |                   |                 |
| Male                                                 | 428               | 0.48            |
| Female                                               | 460               | 0.52            |
| <b>Educational level (1 missing value)</b>           |                   |                 |
| Primary                                              | 195               | 0.22            |
| Secondary                                            | 337               | 0.38            |
| Tertiary                                             | 355               | 0.40            |
| <b>Marital status</b>                                |                   |                 |
| Single                                               | 85                | 0.10            |
| Married                                              | 437               | 0.49            |
| Divorced                                             | 150               | 0.17            |
| Widowed                                              | 216               | 0.24            |
| <b>Number of drugs</b>                               |                   |                 |
| 0–4                                                  | 156               | 0.18            |
| 5–6                                                  | 212               | 0.24            |
| 7–9                                                  | 276               | 0.31            |
| ≥ 10                                                 | 244               | 0.27            |
| <b>Nurse (1 missing value)</b>                       |                   |                 |
| No                                                   | 798               | 0.90            |
| Yes                                                  | 89                | 0.10            |
| <b>Paramedical † (12 missing values)</b>             |                   |                 |
| No                                                   | 572               | 0.65            |
| Yes                                                  | 304               | 0.35            |

|                                   |     |      |
|-----------------------------------|-----|------|
| <b>Homecare (1 missing value)</b> |     |      |
| No                                | 755 | 0.85 |
| Yes                               | 132 | 0.15 |
| <b>EQ5D3L five dimensions</b>     |     |      |
| <b>Mobility</b>                   |     |      |
| No problems                       | 497 | 0.56 |
| Moderate problems                 | 386 | 0.43 |
| Severe problems                   | 5   | 0.01 |
| <b>Self-care</b>                  |     |      |
| No problems                       | 785 | 0.88 |
| Moderate problems                 | 92  | 0.10 |
| Severe problems                   | 11  | 0.01 |
| <b>Usual activities</b>           |     |      |
| No problems                       | 543 | 0.61 |
| Moderate problems                 | 328 | 0.37 |
| Severe problems                   | 17  | 0.02 |
| <b>Pain/discomfort</b>            |     |      |
| No problems                       | 211 | 0.24 |
| Moderate problems                 | 591 | 0.67 |
| Severe problems                   | 86  | 0.10 |
| <b>Anxiety/depression</b>         |     |      |
| No problems                       | 516 | 0.58 |
| Moderate problems                 | 329 | 0.37 |
| Severe problems                   | 43  | 0.05 |

\* TBQ: treatment burden questionnaire

† Paramedical includes physiotherapists/occupational therapists

‡ With multiple imputation

Table 2: Results of bivariate analyses with multiple imputation.

| Variable                                  | $\beta$ | 95% CI  |         | p-value |
|-------------------------------------------|---------|---------|---------|---------|
| Age                                       | 0.0053  | 0.0027  | 0.0079  | 0.0001  |
| Sex                                       | -0.1008 | -0.1643 | -0.0372 | 0.0019  |
| <b>Deprivation</b>                        |         |         |         |         |
| Material deprivation                      | -0.0786 | -0.1034 | -0.0537 | 0.0000  |
| Social deprivation                        | -0.0485 | -0.0707 | -0.0263 | 0.0000  |
| Health deprivation                        | -0.1407 | -0.1853 | -0.0961 | 0.0000  |
| <b>Educational level (ref: Primary)</b>   |         |         |         |         |
| Secondary                                 | 0.0408  | -0.0464 | 0.1280  | 0.3579  |
| Tertiary                                  | 0.0880  | 0.0034  | 0.1726  | 0.0415  |
| <b>Number of medical visits last year</b> | -0.0023 | -0.0060 | 0.0014  | 0.2285  |
| <b>Number of hospitalizations</b>         | -0.0283 | -0.0598 | 0.0033  | 0.0789  |
| <b>Number of chronic conditions</b>       | 0.0042  | -0.0076 | 0.0160  | 0.4820  |
| <b>Number of drugs (ref: 0–4)</b>         |         |         |         |         |
| 5–6                                       | -0.0249 | -0.1238 | 0.0741  | 0.6217  |
| 7–9                                       | 0.0025  | -0.0926 | 0.0976  | 0.9588  |
| ≥ 10                                      | -0.0601 | -0.1579 | 0.0377  | 0.2279  |
| <b>TBQ* score</b>                         | -0.0071 | -0.0086 | -0.0055 | 0.0000  |
| <b>Nurse</b>                              | -0.1016 | -0.2133 | 0.0100  | 0.0743  |
| <b>Paramedical †</b>                      | -0.0843 | -0.1489 | -0.0198 | 0.0105  |
| <b>Homecare</b>                           | -0.0772 | -0.1698 | 0.0153  | 0.1016  |
| <b>Number of specialists</b>              | -0.0284 | -0.0544 | -0.0024 | 0.0322  |
| <b>Severity index</b>                     | -0.0457 | -0.1258 | 0.0344  | 0.2630  |
| <b>Visual analogue scale (EQ5D3L)</b>     | 0.0048  | 0.0032  | 0.0064  | 0.0000  |
| <b>EQ5D3L five dimensions</b>             |         |         |         |         |
| Mobility (ref: No problems)               |         |         |         |         |
| Moderate problems                         | -0.1507 | -0.2131 | -0.0882 | 0.0000  |
| Severe problems                           | -0.1404 | -0.5589 | 0.2781  | 0.5100  |
| Self-care (ref: No problems)              |         |         |         |         |
| Moderate problems                         | -0.1965 | -0.3045 | -0.0884 | 0.0004  |
| Severe problems                           | -0.1464 | -0.4724 | 0.1795  | 0.3755  |
| Usual activities (ref: No problems)       |         |         |         |         |
| Moderate problems                         | -0.1729 | -0.2371 | -0.1086 | 0.0000  |
| Severe problems                           | -0.4167 | -0.6521 | -0.1813 | 0.0006  |
| Pain/discomfort (ref: No problems)        |         |         |         |         |
| Moderate problems                         | -0.1174 | -0.1970 | -0.0378 | 0.0040  |
| Severe problems                           | -0.2760 | -0.3961 | -0.1558 | 0.0000  |
| Anxiety/depression (ref: No problems)     |         |         |         |         |
| Moderate problems                         | -0.2211 | -0.2839 | -0.1584 | 0.0000  |
| Severe problems                           | -0.5390 | -0.6788 | -0.3991 | 0.0000  |

| <b>Marital status (ref: Single)</b> |        |         |        |        |
|-------------------------------------|--------|---------|--------|--------|
| Married                             | 0.1596 | 0.0484  | 0.2709 | 0.0050 |
| Divorced                            | 0.0947 | -0.0315 | 0.2208 | 0.1412 |
| Widowed                             | 0.1128 | -0.0057 | 0.2313 | 0.0619 |

\* TBQ: treatment burden questionnaire

† Paramedical includes physiotherapists/occupational therapists

Table 3: Results of multivariate analyses with multiple imputation.

| <b>Variables</b>                          | <b><math>\beta</math></b> | <b>95% CI</b> |        | <b>p-value</b> |
|-------------------------------------------|---------------------------|---------------|--------|----------------|
| Age                                       | 0.0007                    | -0.0027       | 0.0041 | 0.6889         |
| Sex                                       | -0.0361                   | -0.1043       | 0.0320 | 0.2981         |
| <b>Deprivation</b>                        |                           |               |        |                |
| Material deprivation                      | -0.0245                   | -0.0533       | 0.0043 | 0.0954         |
| Social deprivation                        | -0.0235                   | -0.0480       | 0.0010 | 0.0606         |
| Health deprivation                        | 0.0221                    | -0.0364       | 0.0806 | 0.4577         |
| <b>Educational level (ref: Primary)</b>   |                           |               |        |                |
| Secondary                                 | 0.0070                    | -0.0763       | 0.0903 | 0.8688         |
| Tertiary                                  | 0.0560                    | -0.0284       | 0.1405 | 0.1929         |
| <b>Number of medical visits last year</b> |                           |               |        |                |
|                                           | 0.0009                    | -0.0029       | 0.0048 | 0.6302         |
| <b>Number of hospitalizations</b>         |                           |               |        |                |
|                                           | -0.0183                   | -0.0503       | 0.0136 | 0.2603         |
| <b>Number of chronic conditions</b>       |                           |               |        |                |
|                                           | 0.0096                    | -0.0032       | 0.0224 | 0.1399         |
| <b>Number of drugs (ref: 0–4)</b>         |                           |               |        |                |
| 5–6                                       | -0.0278                   | -0.1210       | 0.0653 | 0.5577         |
| 7–9                                       | 0.0276                    | -0.0647       | 0.1199 | 0.5568         |
| ≥ 10                                      | 0.0110                    | -0.0905       | 0.1125 | 0.8318         |
| <b>TBQ* score</b>                         |                           |               |        |                |
| Nurse                                     | -0.0038                   | -0.0058       | 0.0018 | 0.0002         |
| Paramedical †                             | 0.0228                    | -0.1120       | 0.1577 | 0.7390         |
| Homecare                                  | -0.0327                   | -0.0968       | 0.0314 | 0.3172         |
| <b>Number of specialists</b>              |                           |               |        |                |
|                                           | 0.0057                    | -0.1069       | 0.1183 | 0.9205         |
| <b>Severity index</b>                     |                           |               |        |                |
| Visual analogue scale (EQ5D3L)            | -0.0235                   | -0.0513       | 0.0043 | 0.0967         |
|                                           | 0.0385                    | -0.0420       | 0.1190 | 0.3480         |
| <b>EQ5D3L five dimensions</b>             |                           |               |        |                |
| <b>Mobility (ref: No problem)s</b>        |                           |               |        |                |
|                                           | 0.0000                    | -0.0019       | 0.0019 | 0.9722         |

|    |                                              |         |         |        |        |
|----|----------------------------------------------|---------|---------|--------|--------|
| 1  |                                              |         |         |        |        |
| 2  |                                              |         |         |        |        |
| 3  |                                              |         |         |        |        |
| 4  | Moderate problems                            | -0.0864 | -0.1567 | 0.0161 | 0.0161 |
| 5  | Severe problems                              | 0.1663  | -0.3459 | 0.6786 | 0.5230 |
| 6  |                                              |         |         |        |        |
| 7  | <b>Self-care (ref: No problems)</b>          |         |         |        |        |
| 8  | Moderate problems                            | -0.0440 | -0.1552 | 0.0673 | 0.4379 |
| 9  | Severe problems                              | -0.0661 | -0.4830 | 0.3508 | 0.7532 |
| 10 |                                              |         |         |        |        |
| 11 | <b>Usual activities (ref: No problems)</b>   |         |         |        |        |
| 12 | Moderate problems                            | -0.0244 | -0.0998 | 0.0509 | 0.5242 |
| 13 | Severe problems                              | -0.1912 | -0.4453 | 0.0630 | 0.1402 |
| 14 |                                              |         |         |        |        |
| 15 | <b>Pain/discomfort (ref: No problems)</b>    |         |         |        |        |
| 16 |                                              |         |         |        |        |
| 17 | Moderate problems                            | -0.0033 | -0.0847 | 0.0780 | 0.9356 |
| 18 | Severe problems                              | 0.0073  | -0.1297 | 0.1444 | 0.9161 |
| 19 |                                              |         |         |        |        |
| 20 | <b>Anxiety/depression (ref: No problems)</b> |         |         |        |        |
| 21 |                                              |         |         |        |        |
| 22 | Moderate problems                            | -0.1288 | -0.1978 | 0.0598 | 0.0003 |
| 23 |                                              |         |         |        |        |
| 24 | Severe problems                              | -0.3426 | -0.4996 | 0.1857 | 0.0000 |
| 25 |                                              |         |         |        |        |
| 26 | <b>Marital status (ref: Single)</b>          |         |         |        |        |
| 27 | Married                                      | 0.0953  | -0.0146 | 0.2053 | 0.0890 |
| 28 | Divorced                                     | 0.1360  | 0.0122  | 0.2599 | 0.0314 |
| 29 | Widowed                                      | 0.0780  | -0.0477 | 0.2037 | 0.2233 |

\* TBQ: treatment burden questionnaire

† Paramedical includes physiotherapists/occupational therapists

**STROBE 2007 (v4) Statement—Checklist of items that should be included in reports of *cross-sectional studies***

| Section/Topic                | Item # | Recommendation                                                                                                                                                                       | Reported on page #                   |
|------------------------------|--------|--------------------------------------------------------------------------------------------------------------------------------------------------------------------------------------|--------------------------------------|
| Title and abstract           | 1      | (a) Indicate the study's design with a commonly used term in the title or the abstract                                                                                               | Page 1                               |
|                              |        | (b) Provide in the abstract an informative and balanced summary of what was done and what was found                                                                                  | Page 3                               |
| <b>Introduction</b>          |        |                                                                                                                                                                                      |                                      |
| Background/rationale         | 2      | Explain the scientific background and rationale for the investigation being reported                                                                                                 | Page 5                               |
| Objectives                   | 3      | State specific objectives, including any prespecified hypotheses                                                                                                                     | Page 6                               |
| <b>Methods</b>               |        |                                                                                                                                                                                      |                                      |
| Study design                 | 4      | Present key elements of study design early in the paper                                                                                                                              | Page 7                               |
| Setting                      | 5      | Describe the setting, locations, and relevant dates, including periods of recruitment, exposure, follow-up, and data collection                                                      | Page 7                               |
| Participants                 | 6      | (a) Give the eligibility criteria, and the sources and methods of selection of participants                                                                                          | Page 7                               |
| Variables                    | 7      | Clearly define all outcomes, exposures, predictors, potential confounders, and effect modifiers. Give diagnostic criteria, if applicable                                             | Pages 7, 8 & 9                       |
| Data sources/<br>measurement | 8*     | For each variable of interest, give sources of data and details of methods of assessment (measurement). Describe comparability of assessment methods if there is more than one group | Pages 7, 8 & 9                       |
| Bias                         | 9      | Describe any efforts to address potential sources of bias                                                                                                                            |                                      |
| Study size                   | 10     | Explain how the study size was arrived at                                                                                                                                            | Page 7. cf. Published protocol study |
| Quantitative variables       | 11     | Explain how quantitative variables were handled in the analyses. If applicable, describe which groupings were chosen and why                                                         | Pages 7, 8 & 9                       |
| Statistical methods          | 12     | (a) Describe all statistical methods, including those used to control for confounding                                                                                                | Pages 9 & 10                         |
|                              |        | (b) Describe any methods used to examine subgroups and interactions                                                                                                                  | Pages 9 & 10                         |
|                              |        | (c) Explain how missing data were addressed                                                                                                                                          | Pages 9 & 10                         |
|                              |        | (d) If applicable, describe analytical methods taking account of sampling strategy                                                                                                   | Pages 9 & 10                         |
|                              |        | (e) Describe any sensitivity analyses                                                                                                                                                | Pages 9 & 10                         |



|                          |     |                                                                                                                                                                                                              |                              |
|--------------------------|-----|--------------------------------------------------------------------------------------------------------------------------------------------------------------------------------------------------------------|------------------------------|
| <b>Results</b>           |     |                                                                                                                                                                                                              |                              |
| Participants             | 13* | (a) Report numbers of individuals at each stage of study—eg numbers potentially eligible, examined for eligibility, confirmed eligible, included in the study, completing follow-up, and analysed            | CF. published protocol study |
|                          |     | (b) Give reasons for non-participation at each stage                                                                                                                                                         | CF. published protocol study |
|                          |     | (c) Consider use of a flow diagram                                                                                                                                                                           | CF. published protocol study |
| Descriptive data         | 14* | (a) Give characteristics of study participants (eg demographic, clinical, social) and information on exposures and potential confounders                                                                     | Page 11                      |
|                          |     | (b) Indicate number of participants with missing data for each variable of interest                                                                                                                          | Page 25 & 26                 |
| Outcome data             | 15* | Report numbers of outcome events or summary measures                                                                                                                                                         | Page 25 & 26                 |
| Main results             | 16  | (a) Give unadjusted estimates and, if applicable, confounder-adjusted estimates and their precision (eg, 95% confidence interval). Make clear which confounders were adjusted for and why they were included | Page 27 & 28                 |
|                          |     | (b) Report category boundaries when continuous variables were categorized                                                                                                                                    |                              |
|                          |     | (c) If relevant, consider translating estimates of relative risk into absolute risk for a meaningful time period                                                                                             |                              |
| Other analyses           | 17  | Report other analyses done—eg analyses of subgroups and interactions, and sensitivity analyses                                                                                                               |                              |
| <b>Discussion</b>        |     |                                                                                                                                                                                                              |                              |
| Key results              | 18  | Summarise key results with reference to study objectives                                                                                                                                                     | Page 13                      |
| Limitations              | 19  | Discuss limitations of the study, taking into account sources of potential bias or imprecision. Discuss both direction and magnitude of any potential bias                                                   | Page 16                      |
| Interpretation           | 20  | Give a cautious overall interpretation of results considering objectives, limitations, multiplicity of analyses, results from similar studies, and other relevant evidence                                   | Page 16                      |
| Generalisability         | 21  | Discuss the generalisability (external validity) of the study results                                                                                                                                        | Page 16                      |
| <b>Other information</b> |     |                                                                                                                                                                                                              |                              |
| Funding                  | 22  | Give the source of funding and the role of the funders for the present study and, if applicable, for the original study on which the present article is based                                                | Page 17                      |

\*Give information separately for cases and controls in case-control studies and, if applicable, for exposed and unexposed groups in cohort and cross-sectional studies.

1  
2  
3  
4 **Note:** An Explanation and Elaboration article discusses each checklist item and gives methodological background and published examples of transparent reporting. The STROBE  
5 checklist is best used in conjunction with this article (freely available on the Web sites of PLoS Medicine at <http://www.plosmedicine.org/>, Annals of Internal Medicine at  
6 <http://www.annals.org/>, and Epidemiology at <http://www.epidem.com/>). Information on the STROBE Initiative is available at [www.strobe-statement.org](http://www.strobe-statement.org).  
7  
8  
9  
10  
11  
12  
13  
14  
15  
16  
17  
18  
19  
20  
21  
22  
23  
24  
25  
26  
27  
28  
29  
30  
31  
32  
33  
34  
35  
36  
37  
38  
39  
40  
41  
42  
43  
44  
45  
46  
47

For peer review only

# BMJ Open

## Predictors of health literacy in multimorbid patients in primary care: a cross sectional study in Switzerland

|                                 |                                                                                                                                                                                                                                                                                                                                                                                                                                                                                                                                                                                                                                                                                                                                                                                                                                                                                                                             |
|---------------------------------|-----------------------------------------------------------------------------------------------------------------------------------------------------------------------------------------------------------------------------------------------------------------------------------------------------------------------------------------------------------------------------------------------------------------------------------------------------------------------------------------------------------------------------------------------------------------------------------------------------------------------------------------------------------------------------------------------------------------------------------------------------------------------------------------------------------------------------------------------------------------------------------------------------------------------------|
| Journal:                        | <i>BMJ Open</i>                                                                                                                                                                                                                                                                                                                                                                                                                                                                                                                                                                                                                                                                                                                                                                                                                                                                                                             |
| Manuscript ID                   | bmjopen-2017-018281.R1                                                                                                                                                                                                                                                                                                                                                                                                                                                                                                                                                                                                                                                                                                                                                                                                                                                                                                      |
| Article Type:                   | Research                                                                                                                                                                                                                                                                                                                                                                                                                                                                                                                                                                                                                                                                                                                                                                                                                                                                                                                    |
| Date Submitted by the Author:   | 19-Oct-2017                                                                                                                                                                                                                                                                                                                                                                                                                                                                                                                                                                                                                                                                                                                                                                                                                                                                                                                 |
| Complete List of Authors:       | N'GORAN, A. Alexandra; Institute of Family Medicine University of Lausanne Switzerland;<br>Pasquier, Jérôme; Institute of Social and Preventive Medicine, Lausanne University Hospital, Lausanne, Switzerland,<br>Deruaz-Luyet, Anouk; University of Lausanne, Institute of Family Medicine University of Lausanne, Switzerland<br>Burnand, Bernard; CHUV, Institute of Social and Preventive Medicine<br>Haller, Dagmar; Primary Care Unit, Faculty of Medicine, University of Geneva<br>Neuner-Jehle, Stefan; Institute of Primary Care, University of Zurich, University Hospital of Zurich<br>Zeller, Andreas; Institute of Primary Health Care, University of Basel, Switzerland<br>Streit, Sven; Institute of Primary Health Care BIHAM,<br>Herzig, Lilli; University of Lausanne, Institute of General Medicine<br>Bodenmann, Patrick; University of Lausanne, Departement of Ambulatory Care and Community Medicine |
| <b>Primary Subject Heading</b>: | General practice / Family practice                                                                                                                                                                                                                                                                                                                                                                                                                                                                                                                                                                                                                                                                                                                                                                                                                                                                                          |
| Secondary Subject Heading:      | Public health                                                                                                                                                                                                                                                                                                                                                                                                                                                                                                                                                                                                                                                                                                                                                                                                                                                                                                               |
| Keywords:                       | GENERAL MEDICINE (see Internal Medicine), PRIMARY CARE, PUBLIC HEALTH                                                                                                                                                                                                                                                                                                                                                                                                                                                                                                                                                                                                                                                                                                                                                                                                                                                       |
|                                 |                                                                                                                                                                                                                                                                                                                                                                                                                                                                                                                                                                                                                                                                                                                                                                                                                                                                                                                             |

SCHOLARONE™  
Manuscripts

1  
2  
3 **Predictors of health literacy in multimorbid patients in primary care: a cross-sectional**  
4 **study in Switzerland.**  
5  
6

7  
8 *Running title:* Health literacy in multimorbid patients  
9

10  
11 Alexandra A. N'Goran\*<sup>1</sup>, MD, MPH; Jérôme Pasquier<sup>3</sup>, PhD; Anouk Déruaz-Luyet<sup>1</sup>, PhD;  
12  
13 Bernard Burnand<sup>3</sup>, MD, MPH; Dagmar M Haller<sup>4</sup>, MD, PhD; Stefan Neuner-Jehle<sup>5</sup>, MD, MPH;  
14  
15 Andreas Zeller<sup>6</sup>, MD, MSc; Sven Streit<sup>7</sup>, MD; Lilli Herzig<sup>#1</sup>, MD; and Patrick Bodenmann<sup>#2</sup>,  
16  
17 MD, MSc.  
18  
19

20  
21  
22 <sup>1</sup> Institute of Family Medicine, University of Lausanne, Switzerland.  
23

24  
25 <sup>2</sup> Department of Ambulatory Care and Community Medicine, Lausanne University Hospital,  
26  
27 Switzerland.  
28

29  
30  
31 <sup>3</sup> Institute of Social and Preventive Medicine, Lausanne University Hospital, Switzerland.  
32

33  
34 <sup>4</sup> Primary Care Unit, Faculty of Medicine, University of Geneva, Switzerland.  
35

36  
37 <sup>5</sup> Institute of Primary Care, University of Zurich, Switzerland.  
38

39  
40 <sup>6</sup> Centre for Primary Health Care, University of Basel, Switzerland.  
41

42  
43 <sup>7</sup> Institute of Primary Health Care (BIHAM), University of Bern, Switzerland.  
44

45  
46 <sup>#</sup>These authors contributed equally  
47

48  
49 **\*Corresponding author and guarantor:**  
50

51  
52 Lilli Herzig, MD  
53

54  
55 Institute of Family Medicine, University of Lausanne  
56  
57

1  
2  
3 Rue du Bugnon 44  
4  
5

6 1011 Lausanne  
7  
8

9 Switzerland  
10  
11

12 Phone: + 41 21 314 61 15 / Fax: +41 21 314 75 90  
13  
14

15 Email: lilli.herzig@hin.ch  
16  
17

18 **Word count:** 3215 words  
19  
20

21 **Number of tables:** 3  
22  
23

24 **Number of references:** 47  
25  
26  
27  
28  
29  
30  
31  
32  
33  
34  
35  
36  
37  
38  
39  
40  
41  
42  
43  
44  
45  
46  
47  
48  
49  
50  
51  
52  
53  
54  
55  
56  
57  
58  
59  
60

## Abstract

**Objective:** To identify factors associated with health literacy in multimorbid patients.

**Design:** A nationwide cross-sectional study in Switzerland. Univariate and multivariate linear regressions were calculated to identify variables associated with health literacy. A multiple imputation approach was used to deal with missing values.

**Participants:** Multimorbid patients recruited in primary care settings (N=888), above 18 years old and suffering from at least three of the 75 chronic conditions on a predefined list based on the ICPC-2.

**Main measures:** Health literacy was assessed using the European Health Literacy Survey project questionnaire (HLS-EU 6). This comprises six items scored from 1 to 4 (*very difficult* = 1, *fairly difficult* = 2, *fairly easy* = 3, *very easy* = 4), and the total health literacy score is computed as their mean. As we wished to understand the determinants associated with lower health literacy, the HLS-EU 6 score was the only dependent variable; all other covariates were considered independent.

**Results:** The mean health literacy score (SD) was 2.9 (0.5). Multivariate analyses found significant associations between low health literacy scores and: treatment burden scores ( $\beta = -0.004$ , 95% CI: [-0.006; -0.002]); marital status, predominantly the divorced group ( $\beta = 0.136$ , 95% CI: [0.012; 0.260]); dimensions of the EQ5D3L quality of life assessment, i.e. for moderate problems with mobility ( $\beta = -0.086$ , 95% CI: [-0.157; -0.016]); and with moderate problems ( $\beta = -0.129$ , 95% CI: [-0.198; -0.060]) and severe problems with anxiety/depression ( $\beta = -0.343$ , 95% CI: [-0.500; -0.186]).

1  
2  
3 **Conclusions** Multimorbid patients with a high treatment burden, problems with mobility, or  
4 problems with anxiety or depression, often also have low levels of health literacy. Primary care  
5 practitioners should therefore pay particular attention to these patients in their daily practice.  
6  
7  
8

9  
10  
11 **Keywords:** Health literacy, Multimorbidity, Primary care, Chronic disease, Switzerland.  
12  
13

#### 14 **Article summary**

- 15
- 16
- 17 • This national primary care study enabled the analysis of data from a sample of
- 18 multimorbid patients
- 19
- 20
- 21
- 22 • The first study to understand the determinants associated with health literacy in
- 23 multimorbid patients in primary care settings
- 24
- 25
- 26 • Only multimorbid patients with at least three chronic conditions were assessed
- 27
- 28
- 29 • Causal relationships could not be inferred due to the study design
- 30
- 31
- 32
- 33
- 34
- 35
- 36
- 37
- 38
- 39
- 40
- 41
- 42
- 43
- 44
- 45
- 46
- 47
- 48
- 49
- 50
- 51
- 52
- 53
- 54
- 55
- 56
- 57
- 58
- 59
- 60

## Strengths and limitations

This national primary care study enabled the analysis of data from a relatively representative sample of multimorbid patients suffering from at least three chronic conditions and enrolled in GPs' practices across Switzerland. Although several studies have previously assessed health literacy, to the best of our knowledge, this was the first to have assessed factors associated with health literacy in multimorbid patients in a primary care setting.

However, this study had some limitations. First, the beta coefficients were small, making clinical interpretation difficult, despite the fact that the study gives an overall view of the factors associated with health literacy. Further studies should be done to confirm these trends.

Second, our sample might not be perfectly representative of all multimorbid patients. GPs only recruited patients who came to their practices and who were suffering from at least three chronic conditions from a list of 75 provided to them. The most impaired multimorbid patients, therefore, those with the most extensive mobility problems (i.e. those cared for via homecare visits, in nursing homes, or hospitalised) were not included (selection bias). Our results concerning health literacy in multimorbid patients should thus be interpreted with caution, taking into consideration multimorbid patients who cannot attend GPs' practices or who have rare chronic conditions. Furthermore, we cannot exclude a potential selection bias, as patients who consulted more frequently had a higher chance of being included. However, we found no association between the frequency of consultations and health literacy in our final model.

Third, the health literacy score contained a lot of missing values, and we cannot exclude that the cause of that missing data was related to health literacy itself. However, we examined whether



1  
2  
3 the mean of the available HL items was associated with the number of missing HL items, and  
4  
5 this was not the case.  
6  
7

8 Fourth, due to the study's cross-sectional design, causal relationships cannot be inferred.  
9  
10  
11  
12  
13  
14  
15  
16  
17  
18  
19  
20  
21  
22  
23  
24  
25  
26  
27  
28  
29  
30  
31  
32  
33  
34  
35  
36  
37  
38  
39  
40  
41  
42  
43  
44  
45  
46  
47  
48  
49  
50  
51  
52  
53  
54  
55  
56  
57  
58  
59  
60

For peer review only

## Introduction

Multimorbidity, defined as the occurrence of multiple chronic medical conditions in one individual (1-3), is a steadily increasing phenomenon due to population ageing (4, 5).

Multimorbid patients must face many challenges: more frequent and longer hospitalisations (6, 7), greater use of polypharmacy (causing adverse drug effects) (8, 9), higher expenditure on healthcare (10-12) and the use of a broader range of healthcare services (8, 10). Moreover, as the number of health professionals involved in treatment increases, the more likely patients will be faced with fragmented medical care due to conflicting instructions and care pathways. This makes piecing together and adhering to instructions even more testing and thus prevents patients from participating effectively in their own care (8, 10, 12). Facing all these challenges effectively requires good levels of health literacy. The U.S. Institute of Medicine defines health literacy as “the degree to which individuals have the capacity to obtain, process and understand basic health information and services needed to make appropriate health decisions” (13, 14). Health literacy includes a broad set of skills (i.e. reading, writing, numeracy, communication and, increasingly, the use of digital technologies) needed to make appropriate health decisions and successfully navigate the healthcare system (15). Health literacy is recognized as an important determinant of health (16-18). Studies have shown that lower health literacy is associated with a lower mental and physical health status, adverse disease-specific outcomes, higher mortality, and more use of healthcare but less use of preventive care (17, 19). Consequently, governments, researchers, clinicians and patients’ associations are paying ever more attention to research into health literacy (20).

Effective patient–clinician communication that ensures patients are able to understand the health information and treatment recommendations they receive and feel comfortable enough to ask

1  
2  
3 questions or admit when they do not understand something, is vital to the successful  
4  
5 management of a chronic illness (21). Healthcare providers should be conscious of their patients'  
6  
7 health literacy skills so as to ensure that health information is communicated effectively to help  
8  
9 manage long-term conditions (22, 23). Additionally, health literacy is a prerequisite for patient  
10  
11 activation and shared decision-making. Thus, identifying factors associated with low health  
12  
13 literacy is an important step towards devising effective engagement, prevention and intervention  
14  
15 strategies for patients in primary care (20). The literature shows that health literacy has been  
16  
17 assessed in different ways and with contrasting conclusions: e.g. different studies looking at the  
18  
19 factors influencing health literacy among less well-educated young people showed a relationship  
20  
21 between low health literacy and socioeconomic factors (17, 24, 25). One study evaluating  
22  
23 relevant associations between health literacy and multimorbidity (defined as two or more chronic  
24  
25 diseases from a list of 11 conditions) in primary care, found none (14). To better understand the  
26  
27 determinants associated with low health literacy, the present study aimed to explore all the  
28  
29 factors that might be associated with low health literacy in multimorbid patients in primary care  
30  
31 with at least three chronic conditions.  
32  
33  
34  
35  
36  
37  
38  
39  
40  
41  
42  
43  
44  
45  
46  
47  
48  
49  
50  
51  
52  
53  
54  
55  
56  
57  
58  
59  
60

## Methods

### *1. Participants and procedures*

We analysed data (N = 888) from a national cross-sectional survey conducted in collaboration with Switzerland's five academic institutes of family medicine, between January and September 2015. The study was designed to assess multimorbidity in patients in a primary care setting in order to target a population whose management is more challenging to general practitioners (GPs). The detailed study protocol, dataset description and initial results have been published elsewhere (26, 27).

A convenience sample of 100 GPs randomly enrolled patients from their practices who consulted them during the study period. All multimorbid patients above 18 years old and suffering from at least three of the 75 chronic conditions on a predefined list, based on the International Classification of Primary Care 2 (ICPC-2), were considered eligible (28, 29) and gave written informed consent to participate in the study. The study protocol (Protocol No 314/15) was approved by the Human Research Ethics Committee of the Canton Vaud, Switzerland.

### *2. Measures*

#### *2.1 Health literacy*

Health literacy was assessed using the validated six-item questionnaire from the European Health Literacy Survey project (HLS-EU 6) (30, 31). The HLS-EU was a Europe-wide project developed to gather data on health literacy (30). The original HLS-EU 47 explored three domains: 1. healthcare; 2. disease prevention; and 3. health promotion. Each domain explored four matrices: accessing/obtaining information; understanding information; processing/

1  
2  
3 appraising information; and applying/using information. The HLS-EU 6 is a validated short form  
4  
5 with two of the original questions remaining in each domain (30-32). Validated French and  
6  
7 German versions of the HLS-EU 6 were available. We used this shorter, validated questionnaire  
8  
9 because the present study's main objective was to measure overall levels of health literacy in  
10  
11 multimorbid patients, not to assess health literacy in detail. The HLS-EU 6 scale consists of six  
12  
13 items with five possible responses. Participants were asked to respond to the following questions.  
14  
15 How easy or difficult is it for you to: (a) judge when you may need to get a second opinion from  
16  
17 another doctor? (b) use information the doctor gives you to make decisions about your illness?  
18  
19 (c) find information on how to manage mental health problems like stress or depression? (d)  
20  
21 judge whether the information on health risks in the media is reliable? (e) find out about  
22  
23 activities that are good for your mental wellbeing? and (f) understand information in the media  
24  
25 on how to get healthier? The possible responses and their scores were as follows: *very*  
26  
27 *difficult* = 1, *fairly difficult* = 2, *fairly easy* = 3, *very easy* = 4, and a fifth alternative for when  
28  
29 participants did not answer or did not have a definite answer, coded as a missing value. The  
30  
31 health literacy score was thus calculated as the mean of the six health literacy items, scored from  
32  
33 1 to 4, after imputation of the missing values (see the Statistical Analyses section below) (31).  
34  
35  
36  
37  
38  
39  
40  
41

## 42 2.2 Covariates

43  
44  
45 All the variables have been described elsewhere (26). Briefly, our analyses used the following  
46  
47 variables:  
48  
49

- 50  
51 2.2.1 Dependent variable: as we wished to understand the determinants  
52  
53 associated with lower health literacy scores, we chose the HLS-EU as the  
54  
55 dependent variable.  
56  
57

### 2.2.2 Independent variables: Includes all other variables as:

- age
- sex (female/male)
- marital status (single, married, divorced or widowed)
- educational level (primary, secondary and tertiary)
- number of chronic conditions (based on ICPC 2)
- number of drugs (0–4, 5–6, 7–9, or  $\geq 10$ )
- number of medical visits in the last year (based on GPs' medical records)
- number of hospitalisations in the last year
- Dipcare questionnaire for deprivation assessment, containing 16 items examining the three dimensions of deprivation (material, social and health), and validated for the Swiss population and published elsewhere in detail (33)
- treatment burden questionnaire (TBQ), recently developed to produce a score for the overall burden related to the treatment of chronic conditions (34); it consists of 13 questions to rate with an answer between 0 and 10, with 0 corresponding to *no burden* and 10 to *a very important/considerable burden*
- medical help from a home nurse
- *paramedical therapist* grouped together physiotherapist and/or occupational therapist (yes/no)
- homecare (yes/no)
- number of specialists involved in patient's care
- EQ5D3L composed of five dimensions of health (mobility, self-care, usual activities, pain/discomfort and anxiety/depression) and used a visual analogue scale

- 1  
2  
3 - the severity index (SI) (35-37) was derived by dividing the total cumulative illness rating  
4 scale (CIRS) score, a validated questionnaire published elsewhere in detail (38), by the  
5 number of categories with morbidities.  
6  
7  
8  
9

### 10 11 12 3. *Statistical analyses* 13

14  
15 On collecting the questionnaires, the number of values missing from our variable of interest  
16 (health literacy score) was considered too high (i.e. the health literacy score could not be  
17 computed in full for 577 participants) to reasonably analyse each participant's case in its entirety.  
18 We first considered computing the health literacy scores for all participants with at least five  
19 non-missing items. However, even then, the number of missing scores remained too high (377  
20 participants), and comparisons between complete and the incomplete sets of responses showed  
21 significant differences in several covariates (data not shown). We therefore opted for the  
22 imputation of the values missing from the health literacy items and demographic covariates by  
23 using the multiple imputation approach developed by Rubin (39). As a sensitivity analysis, we  
24 carried out a complete case analysis, and this gave similar results.  
25  
26  
27  
28  
29  
30  
31  
32  
33  
34  
35  
36  
37  
38  
39  
40

41 We calculated means and standard deviations for quantitative variables, and frequencies and  
42 proportions for categorical ones. Univariate and multivariate linear regressions were carried out  
43 to identify predictors of health literacy. Using sensitivity analysis, we checked whether a model  
44 without imputations would produce the same results as the model with multiple imputations:  
45 analysis with and without imputation gave similar results.  
46  
47  
48  
49  
50  
51  
52  
53  
54  
55  
56  
57  
58  
59  
60

1  
2  
3 All analyses were performed using R software version 3.3.2 (40) and the MICE package version  
4  
5 2.29 (41).  
6  
7

## 8 **Results**

### 9 *Descriptive analyses*

10  
11  
12 Cases with at least one missing value among the six items were considered incomplete (239, 18,  
13  
14 417, 168, 252 and 175 missing values for questions (a) to (f), respectively). Of the original 888  
15  
16 patients, 200, 175, 117, 59, 24 and 2 had, respectively, 1, 2, 3, 4, 5 and 6 missing HL variables.  
17  
18 Thus a complete HL score was only computable for 311 respondents (35%), and we therefore  
19  
20 chose to impute the missing values.  
21  
22

23  
24  
25 The mean age (SD) of the participants was 72.9 (12.0) years old; 52.0% were women. Almost  
26  
27 half of the participants were married (49.0%), and 40.0% had a tertiary level of education. The  
28  
29 mean (SD) number of chronic conditions was 7.20 (2.9), and the mean (SD) number of medical  
30  
31 visits in the last year was 12.90 (8.7). The mean health literacy score (SD) of the participants was  
32  
33 2.9 (0.5). Descriptive statistics are summarized in Table 1.  
34  
35  
36  
37  
38  
39  
40  
41  
42  
43

44 *Insert table 1 about here*

45  
46 In bivariate analyses with imputation, we found significant relationships between health literacy  
47  
48 and almost all the covariates except for the number of chronic conditions, number of drugs,  
49  
50 number of medical visits in the last year, number of hospitalisations in the last year, homecare,  
51  
52 nurse, and severity index (Table 2).  
53  
54

55 *Insert table 2 about here*



1  
2  
3  
4  
5  
6 The multivariate analyses showed significant relationships between health literacy and: the  
7  
8 treatment burden score ( $\beta = -0.004$ , 95% CI: [-0.006; -0.002]); marital status, but particularly for  
9  
10 the divorced group ( $\beta = 0.136$ , 95% CI: [0.012; 0.260]); dimensions of the EQ5D3L quality of  
11  
12 life assessment, i.e. moderate problems with mobility and moderate and severe problems with  
13  
14 anxiety/depression ( $\beta = -0.086$ , 95% CI: [-0.157; -0.016]), ( $\beta = -0.129$ , 95% CI: [-0.198; -0.060]),  
15  
16 and ( $\beta = -0.343$ , 95% CI: [-0.500; -0.186]), respectively. Table 3 shows the results of these  
17  
18 multivariate analyses.  
19  
20  
21  
22  
23  
24  
25

26 *Insert table 3 about here*  
27  
28  
29  
30  
31  
32  
33  
34  
35  
36  
37  
38  
39  
40  
41  
42  
43  
44  
45  
46  
47  
48  
49  
50  
51  
52  
53  
54  
55  
56  
57  
58  
59  
60

## Discussion

The present study showed that the mean (SD) health literacy score in our multimorbid primary care patient sample was 2.9 (0.5). In multimorbid patients, a high treatment burden and effects on patients' quality of life due to problems with mobility and anxiety/depression were negatively associated with health literacy. However, our study revealed no association between HL and age. Although several studies have assessed health literacy, to the best of our knowledge, little is known about which factors are associated with low health literacy in multimorbid patients in primary care.

The present study's main finding was that the treatment burden facing multimorbid primary care patients was negatively associated with health literacy. In other words, the higher the treatment burden found in multimorbid patients, the lower their health literacy. This could be explained by the fact that multimorbid patients, facing a high treatment burden and several associated diseases at once, are so concerned about simply coping with their care procedures and treatment that they do not have time to improve their literacy and truly understand those medical acts. This is a common result of polypharmacy, several different treatment procedures and care regimens, and numerous administrative procedures. When we look at all of these elements together, patients faced with the complex situation of a high treatment burden may well become confused: there are too many things happening at the same time for them to be able to understand and manage them effectively. They therefore have neither the time nor the energy to improve their health literacy from its initial low level.

1  
2  
3 This is a very interesting finding, and although the  $\beta$  coefficient is small, we believe that this  
4 result is clinically relevant and allows us to identify treatment burden as an element to take into  
5 account for potentially low literacy in multimorbid patients.  
6  
7

8  
9  
10 However, our exploratory study was unable to determine any causal association between the  
11 treatment burden and health literacy. But our results could also be considered from another  
12 angle, that has been taken in other analyses". Indeed, individuals with low health literacy are  
13 usually less well educated and belong to lower socioeconomic groups. Multimorbidity is higher  
14 in these groups and patients in them are likely to suffer more severely and from more diseases,  
15 leading to a higher treatment burden. Furthermore, low health literacy, used as an independent  
16 variable, has been found to be associated with a reduced ability of adults with coronary heart  
17 disease to identify medication (42), poor health outcomes (14, 19, 43), and a more significant use  
18 of healthcare (44). These three factors can also be linked to multimorbidity and may have an  
19 impact on the overall treatment burden.  
20  
21  
22  
23  
24  
25  
26  
27  
28  
29  
30  
31  
32  
33  
34  
35  
36  
37

38 Another important finding was that patients whose quality of life had been altered by problems  
39 related to anxiety/depression or mobility were more likely to have low levels of health literacy.  
40 One explanation for the association between problems of anxiety/depression and low health  
41 literacy could be that these syndromes can impair cognitive focus, energy and patient motivation.  
42 They might also be expected to affect patients' motivation and ability (45) to seek out and  
43 understand information about their diseases and treatment, resulting in a lower level of health  
44 literacy, especially in the complex context of multimorbidity. We could suggest that anxious,  
45 depressed patients should expend their energies on dealing with their treatment difficulties and  
46  
47  
48  
49  
50  
51  
52  
53  
54  
55  
56  
57  
58  
59  
60

1  
2  
3 reduced quality of life rather than worrying about improving their level of health literacy.

4  
5 Moreover, anxiety and depression may well be higher when patients have to face up to more  
6  
7 numerous health problems, especially in multimorbidity. This result is not concordant with the  
8  
9 study by Green et al. (46), however, which found no association between limited health literacy  
10  
11 and depression in patients receiving chronic hemodialysis treatment, but this difference might be  
12  
13 explained by the differences in the study populations, how health literacy was assessed and the  
14  
15 fact that his study used health literacy as independent variable.  
16  
17

18  
19 Concerning the association between mobility problems and low health literacy, one explanation  
20  
21 might be that patients with mobility problems are more dependent on their relatives. Their lack  
22  
23 of physical energy may reduce their motivation and interest in searching out and understanding  
24  
25 information about their health and how to manage their health concerns: their over-reliance on  
26  
27 relatives results in a low level of health literacy. Thus, multimorbid patients with mobility  
28  
29 problems would be less inclined to actively search for of health information and might have a  
30  
31 tendency to give up their independence somewhat. Moreover, problems of mobility could  
32  
33 exacerbate problems of anxiety/depression, resulting in combined effects and explanations for  
34  
35 low levels of health literacy in multimorbid patients. However, we can only speculate as to  
36  
37 whether there is any precise explanation of these associations and, due to its design, the study's  
38  
39 findings could be interpreted the other way (i.e. that health literacy influences  
40  
41 anxiety/depression).  
42  
43  
44  
45  
46  
47

48 The present study found no association between the level of health literacy of multimorbid  
49  
50 primary care patients and their use of healthcare services, especially with regards to the number  
51  
52 of consultations with their GP or the number of hospitalisations in the past year. Results in the  
53  
54 literature are inconsistent. The study by Vandenbosch et al. (44) found no significant  
55  
56  
57

1  
2  
3 associations between health literacy and the number of medical visits or hospitalisations,  
4  
5 whereas a study by Duong et al. (47) described an association between health literacy and  
6  
7 healthcare use. These results are inconsistent due to differences in the study populations (i.e. our  
8  
9 study population was composed of multimorbid patients in primary care settings) and  
10  
11 methodologies (other studies considered health literacy as an independent variable). Indeed, we  
12  
13 suggest that health literacy in multimorbid patients is different from that in the general  
14  
15 population and should be assessed differently. Further research should aim to clearly confirm or  
16  
17 invalidate our results with multimorbid patients.  
18  
19  
20

### 21 22 **Strengths and limitations**

23  
24  
25 This national primary care study enabled the analysis of data from a relatively representative  
26  
27 sample of multimorbid patients suffering from at least three chronic conditions and enrolled in  
28  
29 GPs' practices across Switzerland. Although several studies have previously assessed health  
30  
31 literacy, to the best of our knowledge, this was the first to have assessed factors associated with  
32  
33 health literacy in multimorbid patients in a primary care setting.  
34  
35

36  
37 However, this study had some limitations. First, the beta coefficients were small, making clinical  
38  
39 interpretation difficult, despite the fact that the study gives an overall view of the factors  
40  
41 associated with health literacy. Further studies should be done to confirm these trends.  
42  
43  
44

45  
46 Second, our sample might not be perfectly representative of all multimorbid patients. GPs only  
47  
48 recruited patients who came to their practices and who were suffering from at least three chronic  
49  
50 conditions from a list of 75 provided to them. The most impaired multimorbid patients, therefore,  
51  
52 those with the most extensive mobility problems (i.e. those cared for via homecare visits, in  
53  
54 nursing homes, or hospitalised) were not included (selection bias). Our results concerning health  
55  
56  
57  
58  
59  
60

1  
2  
3 literacy in multimorbid patients should thus be interpreted with caution, taking into consideration  
4 multimorbid patients who cannot attend GPs' practices or who have rare chronic conditions.  
5  
6 Furthermore, we cannot exclude a potential selection bias, as patients who consulted more  
7 frequently had a higher chance of being included. However, we found no association between the  
8 frequency of consultations and health literacy in our final model.  
9  
10  
11  
12  
13

14  
15 Third, the health literacy score contained a lot of missing values, and we cannot exclude that the  
16 cause of that missing data was related to health literacy itself. However, we examined whether  
17 the mean of the available HL items was associated with the number of missing HL items, and  
18 this was not the case.  
19  
20  
21  
22  
23

24  
25 Fourth, due to the study's cross-sectional design, causal relationships cannot be inferred.  
26  
27

## 28 **Conclusion**

29  
30  
31 The present study highlights the factors associated with health literacy in multimorbid patients. It  
32 provides useful information that could guide GPs in their daily practice and help them to pay  
33 more attention to patients at risk of having low health literacy. With the knowledge that  
34 multimorbidity increases the risks of poor health outcomes, it is particularly important to note  
35 that low health literacy is associated with poor health outcomes too. Indeed, despite a greater use  
36 of healthcare services, there is less use of preventive care. Even though, with the current state of  
37 knowledge, we cannot demonstrate causal relationships between multimorbidity and the  
38 treatment burden or quality of life, GPs should carefully weigh up how best to transmit clinical  
39 information to their patients, in an understandable manner, so that they may comprehend it  
40 without too much complexity. Moreover, with ageing populations and the likely increase in the  
41 numbers of multimorbid patients, it will be important to develop new strategies to improve their  
42  
43  
44  
45  
46  
47  
48  
49  
50  
51  
52  
53  
54  
55  
56  
57  
58  
59  
60

1  
2  
3 health literacy and, in so doing, improve their treatment and patient management in primary care  
4  
5 settings.  
6  
7

## 8 **Funding**

10  
11 This work was supported by Swiss University Conference project P10, which granted funding to  
12 reinforce teaching and research in Primary Care in Switzerland. Within the framework of this  
13 financial support, Switzerland's five university institutes of family medicine (in Basel, Bern,  
14 Geneva, Lausanne and Zurich) collaborate as the Swiss Academy of Family Medicine  
15 (SAFMED). The funding source had no role in study design, data collection, analysis or  
16 interpretation, nor in the preparation of the manuscript and the decision to submit the paper for  
17 publication.  
18  
19  
20  
21  
22  
23  
24  
25  
26  
27

## 28 **Acknowledgement**

29  
30 The authors are grateful to all the GPs and patients for their extensive participation.  
31  
32  
33  
34  
35

## 36 **Conflict of interest:**

37  
38 The authors declare no conflicts of interest.  
39  
40

## 41 **Authors' contributions**

42  
43 AAN, ADL, BB, DMH, AZ, LH and PB developed the protocol for the MMFM study. LH, AZ  
44 and DMH ensured the recruitment of participating GPs. AAN was primarily responsible for  
45 planning the analysis and drafting the manuscript. JP was responsible for the analyses. PB, JP  
46 and LH helped to improve the manuscript during this process. BB, AD, DMH, SS, SNJ, AZ, PB  
47  
48  
49  
50  
51  
52  
53  
54  
55  
56  
57  
58  
59  
60

1  
2  
3 and LH made contributions to the interpretation of the findings and the content of the final  
4  
5 manuscript. All authors read and approved the final manuscript.  
6  
7

### 8 **Data Sharing Statement**

9  
10  
11 Data are available at family medicine institute of Lausanne.  
12  
13  
14  
15  
16  
17  
18  
19  
20  
21  
22  
23  
24  
25  
26  
27  
28  
29  
30  
31  
32  
33  
34  
35  
36  
37  
38  
39  
40  
41  
42  
43  
44  
45  
46  
47  
48  
49  
50  
51  
52  
53  
54  
55  
56  
57  
58  
59  
60

For peer review only



## REFERENCES

1. Uijen AA, van de Lisdonk EH. Multimorbidity in primary care: prevalence and trend over the last 20 years. *The European journal of general practice*. 2008;14(sup1):28-32.
2. Valderas JM, Starfield B, Sibbald B, Salisbury C, Roland M. Defining comorbidity: implications for understanding health and health services. *The Annals of Family Medicine*. 2009;7(4):357-63.
3. van den Akker M, Buntinx F, Metsemakers JF, Roos S, Knottnerus JA. Multimorbidity in general practice: prevalence, incidence, and determinants of co-occurring chronic and recurrent diseases. *J Clin Epidemiol*. 1998;51(5):367-75.
4. Goodman RA. Defining and measuring chronic conditions: imperatives for research, policy, program, and practice. *Preventing chronic disease*. 2013;10.
5. Heyworth IT, Hazell ML, Linehan MF, Frank TL. How do common chronic conditions affect health-related quality of life? *Br J Gen Pract*. 2009;59(568):e353-e8.
6. Condelius A, Edberg A-K, Jakobsson U, Hallberg IR. Hospital admissions among people 65+ related to multimorbidity, municipal and outpatient care. *Archives of gerontology and geriatrics*. 2008;46(1):41-55.
7. Smith SM, O'Dowd T. Chronic diseases: what happens when they come in multiples? : *British Journal of General Practice*; 2007.
8. Vogeli C, Shields AE, Lee TA, Gibson TB, Marder WD, Weiss KB, et al. Multiple chronic conditions: prevalence, health consequences, and implications for quality, care management, and costs. *Journal of general internal medicine*. 2007;22(3):391-5.
9. Wehling M. Multimorbidity and polypharmacy: how to reduce the harmful drug load and yet add needed drugs in the elderly? Proposal of a new drug classification: fit for the aged. *Journal of the American Geriatrics Society*. 2009;57(3):560-1.
10. Bayliss EA, Edwards AE, Steiner JF, Main DS. Processes of care desired by elderly patients with multimorbidities. *Family Practice*. 2008;25(4):287-93.
11. Bodenheimer T, Fernandez A. High and rising health care costs. Part 4: can costs be controlled while preserving quality? *Annals of Internal Medicine*. 2005;143(1):26-31.
12. Taylor AW, Price K, Gill TK, Adams R, Pilkington R, Carrangis N, et al. Multimorbidity-not just an older person's issue. Results from an Australian biomedical study. *BMC public health*. 2010;10(1):718.
13. Kindig DA, Panzer AM, Nielsen-Bohlman L. *Health literacy: a prescription to end confusion*: National Academies Press; 2004.
14. Hudon C, Fortin M, Poitras M-E, Almirall J. The relationship between literacy and multimorbidity in a primary care setting. *BMC family practice*. 2012;13(1):33.
15. Hersh L, Salzman B, Snyderman D. *Health Literacy in Primary Care Practice*. *American family physician*. 2015;92(2).
16. Bennett IM, Chen J, Soroui JS, White S. The contribution of health literacy to disparities in self-rated health status and preventive health behaviors in older adults. *The Annals of Family Medicine*. 2009;7(3):204-11.
17. van der Heide I, Uiters E, Sørensen K, Röthlin F, Pelikan J, Rademakers J, et al. Health literacy in Europe: the development and validation of health literacy prediction models. *The European Journal of Public Health*. 2016;26(6):906-11.
18. van der Heide I, Wang J, Droomers M, Spreeuwenberg P, Rademakers J, Uiters E. The relationship between health, education, and health literacy: results from the Dutch Adult Literacy and Life Skills Survey. *J Health Commun*. 2013;18 Suppl 1:172-84.
19. Berkman ND, Sheridan SL, Donahue KE, Halpern DJ, Crotty K. Low health literacy and health outcomes: an updated systematic review. *Annals of internal medicine*. 2011;155(2):97-107.

20. Friis K, Lasgaard M, Osborne RH, Maindal HT. Gaps in understanding health and engagement with healthcare providers across common long-term conditions: a population survey of health literacy in 29 473 Danish citizens. *BMJ open*. 2016;6(1):e009627.
21. Barrett SE, Puryear JS. Health literacy: improving quality of care in primary care settings. *Journal of Health Care for the Poor and Underserved*. 2006;17(4):690-7.
22. Al Sayah F, Majumdar SR, Williams B, Robertson S, Johnson JA. Health literacy and health outcomes in diabetes: a systematic review. *J Gen Intern Med*. 2013;28(3):444-52.
23. Seligman HK, Wang FF, Palacios JL, Wilson CC, Daher CA, Piette JD, et al. Physician notification of their diabetes patients' limited health literacy: A randomized, controlled trial. *J Gen Intern Med*. 2005;20(11):1077.
24. Quenzel G, Schaeffer D, Messer M, Vogt D. Health literacy among less well-educated young people: Influencing factors and consequences. *Bundesgesundheitsblatt, Gesundheitsforschung, Gesundheitsschutz*. 2015;58(9):951-7.
25. Sorensen K, Pelikan JM, Rothlin F, Ganahl K, Slonska Z, Doyle G, et al. Health literacy in Europe: comparative results of the European health literacy survey (HLS-EU). *Eur J Public Health*. 2015;25(6):1053-8.
26. Déruaz-Luyet A, N'Goran AA, Tandjung R, Frey P, Zeller A, Haller DM, et al. Multimorbidity in primary care: protocol of a national cross-sectional study in Switzerland. *BMJ open*. 2015;5(10):e009165.
27. Deruaz-Luyet A, N'Goran AA, Senn N, Bodenmann P, Pasquier J, Widmer D, et al. Multimorbidity and patterns of chronic conditions in a primary care population in Switzerland: a cross-sectional study. *BMJ Open*. 2017;7(6):e013664.
28. N'Goran AA, Blaser J, Deruaz-Luyet A, Senn N, Frey P, Haller DM, et al. From chronic conditions to relevance in multimorbidity: a four-step study in family medicine. *Family Practice*. 2016:cmw030.
29. Hofmans-Okkes IM, Lamberts H. The International Classification of Primary Care (ICPC): new applications in research and computer-based patient records in family practice. *Fam Pract*. 1996;13(3):294-302.
30. Consortium H-E. Comparative report of health literacy in eight EU member states. The European health literacy survey HLS-EU. 2012.
31. Pelikan J, Röthlin F, Ganahl K, Peer S, editors. Measuring comprehensive health literacy in general populations—le HLS-EU instruments. Presentation at the Second International Conference of Health Literacy and Health Promotion; 2014.
32. Sorensen K, Van den Broucke S, Pelikan JM, Fullam J, Doyle G, Slonska Z, et al. Measuring health literacy in populations: illuminating the design and development process of the European Health Literacy Survey Questionnaire (HLS-EU-Q). *BMC Public Health*. 2013;13:948.
33. Vaucher P, Bischoff T, Diserens E-A, Herzig L, Meystre-Agustoni G, Panese F, et al. Detecting and measuring deprivation in primary care: development, reliability and validity of a self-reported questionnaire: the DiPCare-Q. *BMJ open*. 2012;2(1):e000692.
34. Tran V-T, Montori VM, Eton DT, Baruch D, Falissard B, Ravaud P. Development and description of measurement properties of an instrument to assess treatment burden among patients with multiple chronic conditions. *BMC medicine*. 2012;10(1):68.
35. Brett T, Arnold-Reed DE, Popescu A, Soliman B, Balsara MK, Fine H, et al. Multimorbidity in patients attending 2 Australian primary care practices. *The Annals of Family Medicine*. 2013;11(6):535-42.
36. Miller M, Towers A. A manual of guidelines for scoring the Cumulative Illness Rating Scale for Geriatrics (CIRS-G). Pittsburgh, PA: University of Pittsburgh. 1991.
37. Miller MD, Paradis CF, Houck PR, Mazumdar S, Stack JA, Rifai AH, et al. Rating chronic medical illness burden in geropsychiatric practice and research: application of the Cumulative Illness Rating Scale. *Psychiatry research*. 1992;41(3):237-48.

- 1  
2  
3 38. Linn BS, LINN MW, Gurel L. Cumulative illness rating scale. *Journal of the American Geriatrics Society*. 1968;16(5):622-6.
- 4  
5 39. Rubin R. *Multiple imputation for nonresponse in surveys* (J Wiley & Sons, New York, NY). 1987.
- 6  
7 40. RCore T. R: A language and environment for statistical computing. R Foundation for Statistical Computing, Vienna, Austria. Online: [http://www R-project org](http://www.R-project.org). 2013.
- 8  
9 41. Buuren S, Groothuis-Oudshoorn K. mice: Multivariate imputation by chained equations in R. *Journal of statistical software*. 2011;45(3).
- 10  
11 42. Kripalani S, Henderson LE, Chiu EY, Robertson R, Kolm P, Jacobson TA. Predictors of Medication Self-management Skill in a Low-literacy Population. *Journal of general internal medicine*. 2006;21(8):852-6.
- 12  
13 43. Baker DW, Parker RM, Williams MV, Clark WS, Nurss J. The relationship of patient reading ability to self-reported health and use of health services. *American journal of public health*. 1997;87(6):1027-30.
- 14  
15 44. Vandenbosch J, Van den Broucke S, Vancorenland S, Avalosse H, Verniest R, Callens M. Health literacy and the use of healthcare services in Belgium. *Journal of epidemiology and community health*. 2016;jech-2015-206910.
- 16  
17 45. DiMatteo MR, Lepper HS, Croghan TW. Depression is a risk factor for noncompliance with medical treatment: meta-analysis of the effects of anxiety and depression on patient adherence. *Archives of internal medicine*. 2000;160(14):2101-7.
- 18  
19 46. Green JA, Mor MK, Shields AM, Sevick MA, Palevsky PM, Fine MJ, et al. Prevalence and demographic and clinical associations of health literacy in patients on maintenance hemodialysis. *Clinical Journal of the American Society of Nephrology*. 2011;6(6):1354-60.
- 20  
21 47. Duong VT, Lin I-F, Sorensen K, Pelikan JM, Van Den Broucke S, Lin Y-C, et al. Health literacy in Taiwan: A population-based study. *Asia Pacific Journal of Public Health*. 2015;27(8):871-80.
- 22  
23  
24  
25  
26  
27  
28  
29  
30  
31  
32  
33  
34  
35  
36  
37  
38  
39  
40  
41  
42  
43  
44  
45  
46  
47  
48  
49  
50  
51  
52  
53  
54  
55  
56  
57  
58  
59  
60

Table 1: Descriptive statistics of the sample of multimorbid patients, N = 888.

| Variable                                             | mean <sup>‡</sup> | sd <sup>‡</sup> |
|------------------------------------------------------|-------------------|-----------------|
| Age                                                  | 72.93             | 12.00           |
| Health literacy score (577 missing values)           | 2.87              | 0.45            |
| Material deprivation score                           | 0.50              | 1.27            |
| Social deprivation score                             | 1.93              | 1.38            |
| Health deprivation score                             | 0.48              | 0.68            |
| Number of medical visits last year (1 missing value) | 12.90             | 8.70            |
| Number of hospitalisations (3 missing values)        | 0.54              | 0.99            |
| Number of chronic conditions (4 missing values)      | 7.20              | 2.86            |
| TBQ* score                                           | 26.77             | 18.60           |
| Number of specialists (141 missing values)           | 2.23              | 1.27            |
| Severity index                                       | 1.75              | 0.38            |
| Visual analogue scale (EQ5D3L)                       | 63.19             | 19.25           |
| Variable                                             | count             | prop            |
| <b>Sex</b>                                           |                   |                 |
| Male                                                 | 428               | 0.48            |
| Female                                               | 460               | 0.52            |
| <b>Educational level (1 missing value)</b>           |                   |                 |
| Primary                                              | 195               | 0.22            |
| Secondary                                            | 337               | 0.38            |
| Tertiary                                             | 355               | 0.40            |
| <b>Marital status</b>                                |                   |                 |
| Single                                               | 85                | 0.10            |
| Married                                              | 437               | 0.49            |
| Divorced                                             | 150               | 0.17            |
| Widowed                                              | 216               | 0.24            |
| <b>Number of drugs</b>                               |                   |                 |
| 0–4                                                  | 156               | 0.18            |
| 5–6                                                  | 212               | 0.24            |
| 7–9                                                  | 276               | 0.31            |
| ≥ 10                                                 | 244               | 0.27            |
| <b>Home Nurse (1 missing value)</b>                  |                   |                 |
| No                                                   | 798               | 0.90            |
| Yes                                                  | 89                | 0.10            |
| <b>Paramedical † (12 missing values)</b>             |                   |                 |
| No                                                   | 572               | 0.65            |
| Yes                                                  | 304               | 0.35            |

| <b>Homecare (1 missing value)</b> |     |      |
|-----------------------------------|-----|------|
| No                                | 755 | 0.85 |
| Yes                               | 132 | 0.15 |
| <b>EQ5D3L five dimensions</b>     |     |      |
| <b>Mobility</b>                   |     |      |
| No problems                       | 497 | 0.56 |
| Moderate problems                 | 386 | 0.43 |
| Severe problems                   | 5   | 0.01 |
| <b>Self-care</b>                  |     |      |
| No problems                       | 785 | 0.88 |
| Moderate problems                 | 92  | 0.10 |
| Severe problems                   | 11  | 0.01 |
| <b>Usual activities</b>           |     |      |
| No problems                       | 543 | 0.61 |
| Moderate problems                 | 328 | 0.37 |
| Severe problems                   | 17  | 0.02 |
| <b>Pain/discomfort</b>            |     |      |
| No problems                       | 211 | 0.24 |
| Moderate problems                 | 591 | 0.67 |
| Severe problems                   | 86  | 0.10 |
| <b>Anxiety/depression</b>         |     |      |
| No problems                       | 516 | 0.58 |
| Moderate problems                 | 329 | 0.37 |
| Severe problems                   | 43  | 0.05 |

\* TBQ: treatment burden questionnaire

† Paramedical includes physiotherapists/occupational therapists

‡ With multiple imputation

Table 2: Results of bivariate analyses with multiple imputation.

| <b>Independent variable</b>               | <b><math>\beta</math></b> | <b>95% CI</b> |         | <b>p-value</b> |
|-------------------------------------------|---------------------------|---------------|---------|----------------|
| Age                                       | 0.0053                    | 0.0027        | 0.0079  | 0.0001         |
| Sex                                       | -0.1008                   | -0.1643       | -0.0372 | 0.0019         |
| <b>Deprivation</b>                        |                           |               |         |                |
| Material deprivation                      | -0.0786                   | -0.1034       | -0.0537 | 0.0000         |
| Social deprivation                        | -0.0485                   | -0.0707       | -0.0263 | 0.0000         |
| Health deprivation                        | -0.1407                   | -0.1853       | -0.0961 | 0.0000         |
| <b>Educational level (ref: Primary)</b>   |                           |               |         |                |
| Secondary                                 | 0.0408                    | -0.0464       | 0.1280  | 0.3579         |
| Tertiary                                  | 0.0880                    | 0.0034        | 0.1726  | 0.0415         |
| <b>Number of medical visits last year</b> | -0.0023                   | -0.0060       | 0.0014  | 0.2285         |
| <b>Number of hospitalisations</b>         | -0.0283                   | -0.0598       | 0.0033  | 0.0789         |
| <b>Number of chronic conditions</b>       | 0.0042                    | -0.0076       | 0.0160  | 0.4820         |
| <b>Number of drugs (ref: 0–4)</b>         |                           |               |         |                |
| 5–6                                       | -0.0249                   | -0.1238       | 0.0741  | 0.6217         |
| 7–9                                       | 0.0025                    | -0.0926       | 0.0976  | 0.9588         |
| $\geq 10$                                 | -0.0601                   | -0.1579       | 0.0377  | 0.2279         |
| <b>TBQ* score</b>                         | -0.0071                   | -0.0086       | -0.0055 | 0.0000         |
| <b>Home nurse</b>                         | -0.1016                   | -0.2133       | 0.0100  | 0.0743         |
| <b>Paramedical †</b>                      | -0.0843                   | -0.1489       | -0.0198 | 0.0105         |
| <b>Homecare</b>                           | -0.0772                   | -0.1698       | 0.0153  | 0.1016         |
| <b>Number of specialists</b>              | -0.0284                   | -0.0544       | -0.0024 | 0.0322         |
| <b>Severity index</b>                     | -0.0457                   | -0.1258       | 0.0344  | 0.2630         |
| <b>Visual analogue scale (EQ5D3L)</b>     | 0.0048                    | 0.0032        | 0.0064  | 0.0000         |
| <b>EQ5D3L five dimensions</b>             |                           |               |         |                |
| Mobility (ref: No problems)               |                           |               |         |                |
| Moderate problems                         | -0.1507                   | -0.2131       | -0.0882 | 0.0000         |
| Severe problems                           | -0.1404                   | -0.5589       | 0.2781  | 0.5100         |
| Self-care (ref: No problems)              |                           |               |         |                |
| Moderate problems                         | -0.1965                   | -0.3045       | -0.0884 | 0.0004         |
| Severe problems                           | -0.1464                   | -0.4724       | 0.1795  | 0.3755         |
| Usual activities (ref: No problems)       |                           |               |         |                |
| Moderate problems                         | -0.1729                   | -0.2371       | -0.1086 | 0.0000         |
| Severe problems                           | -0.4167                   | -0.6521       | -0.1813 | 0.0006         |
| Pain/discomfort (ref: No problems)        |                           |               |         |                |
| Moderate problems                         | -0.1174                   | -0.1970       | -0.0378 | 0.0040         |
| Severe problems                           | -0.2760                   | -0.3961       | -0.1558 | 0.0000         |
| Anxiety/depression (ref: No problems)     |                           |               |         |                |
| Moderate problems                         | -0.2211                   | -0.2839       | -0.1584 | 0.0000         |

|                                     |         |         |         |        |
|-------------------------------------|---------|---------|---------|--------|
| Severe problems                     | -0.5390 | -0.6788 | -0.3991 | 0.0000 |
| <b>Marital status (ref: Single)</b> |         |         |         |        |
| Married                             | 0.1596  | 0.0484  | 0.2709  | 0.0050 |
| Divorced                            | 0.0947  | -0.0315 | 0.2208  | 0.1412 |
| Widowed                             | 0.1128  | -0.0057 | 0.2313  | 0.0619 |

For peer review only

Table 3: Results of multivariate analyses with multiple imputation.

| <b>Independent variables</b>              | <b><math>\beta</math></b> | <b>95% CI</b> |        | <b>p-value</b> |
|-------------------------------------------|---------------------------|---------------|--------|----------------|
| Age                                       | 0.0007                    | -0.0027       | 0.0041 | 0.6889         |
| Sex                                       | -0.0361                   | -0.1043       | 0.0320 | 0.2981         |
| <b>Deprivation</b>                        |                           |               |        |                |
| Material deprivation                      | -0.0245                   | -0.0533       | 0.0043 | 0.0954         |
| Social deprivation                        | -0.0235                   | -0.0480       | 0.0010 | 0.0606         |
| Health deprivation                        | 0.0221                    | -0.0364       | 0.0806 | 0.4577         |
| <b>Educational level (ref: Primary)</b>   |                           |               |        |                |
| Secondary                                 | 0.0070                    | -0.0763       | 0.0903 | 0.8688         |
| Tertiary                                  | 0.0560                    | -0.0284       | 0.1405 | 0.1929         |
| <b>Number of medical visits last year</b> |                           |               |        |                |
|                                           | 0.0009                    | -0.0029       | 0.0048 | 0.6302         |
| <b>Number of hospitalisations</b>         |                           |               |        |                |
|                                           | -0.0183                   | -0.0503       | 0.0136 | 0.2603         |
| <b>Number of chronic conditions</b>       |                           |               |        |                |
|                                           | 0.0096                    | -0.0032       | 0.0224 | 0.1399         |
| <b>Number of drugs (ref: 0–4)</b>         |                           |               |        |                |
| 5–6                                       | -0.0278                   | -0.1210       | 0.0653 | 0.5577         |
| 7–9                                       | 0.0276                    | -0.0647       | 0.1199 | 0.5568         |
| $\geq 10$                                 | 0.0110                    | -0.0905       | 0.1125 | 0.8318         |
| <b>TBQ* score</b>                         |                           |               |        |                |
| Nurse                                     | 0.0228                    | -0.1120       | 0.1577 | 0.7390         |
| Paramedical †                             | -0.0327                   | -0.0968       | 0.0314 | 0.3172         |
| <b>Homecare</b>                           |                           |               |        |                |
|                                           | 0.0057                    | -0.1069       | 0.1183 | 0.9205         |
| <b>Number of specialists</b>              |                           |               |        |                |
|                                           | -0.0235                   | -0.0513       | 0.0043 | 0.0967         |
| <b>Severity index</b>                     |                           |               |        |                |
|                                           | 0.0385                    | -0.0420       | 0.1190 | 0.3480         |
| <b>Visual analogue scale (EQ5D3L)</b>     |                           |               |        |                |
|                                           | 0.0000                    | -0.0019       | 0.0019 | 0.9722         |



| <b>EQ5D3L five dimensions</b>                |         |         |         |        |
|----------------------------------------------|---------|---------|---------|--------|
| <b>Mobility (ref: No problem)s</b>           |         |         |         |        |
| Moderate problems                            | -0.0864 | -0.1567 | -0.0161 | 0.0161 |
| Severe problems                              | 0.1663  | -0.3459 | 0.6786  | 0.5230 |
| <b>Self-care (ref: No problems)</b>          |         |         |         |        |
| Moderate problems                            | -0.0440 | -0.1552 | 0.0673  | 0.4379 |
| Severe problems                              | -0.0661 | -0.4830 | 0.3508  | 0.7532 |
| <b>Usual activities (ref: No problems)</b>   |         |         |         |        |
| Moderate problems                            | -0.0244 | -0.0998 | 0.0509  | 0.5242 |
| Severe problems                              | -0.1912 | -0.4453 | 0.0630  | 0.1402 |
| <b>Pain/discomfort (ref: No problems)</b>    |         |         |         |        |
| Moderate problems                            | -0.0033 | -0.0847 | 0.0780  | 0.9356 |
| Severe problems                              | 0.0073  | -0.1297 | 0.1444  | 0.9161 |
| <b>Anxiety/depression (ref: No problems)</b> |         |         |         |        |
| Moderate problems                            | -0.1288 | -0.1978 | -0.0598 | 0.0003 |
| Severe problems                              | -0.3426 | -0.4996 | -0.1857 | 0.0000 |
| <b>Marital status (ref: Single)</b>          |         |         |         |        |
| Married                                      | 0.0953  | -0.0146 | 0.2053  | 0.0890 |
| Divorced                                     | 0.1360  | 0.0122  | 0.2599  | 0.0314 |
| Widowed                                      | 0.0780  | -0.0477 | 0.2037  | 0.2233 |

1  
2  
3  
4  
5  
6  
7  
8  
9  
10  
11  
12  
13  
14  
15  
16  
17  
18  
19  
20  
21  
22  
23  
24  
25  
26  
27  
28  
29  
30  
31  
32  
33  
34  
35  
36  
37  
38  
39  
40  
41  
42  
43  
44  
45  
46  
47  
48  
49  
50  
51  
52  
53  
54  
55  
56  
57  
58  
59  
60

For peer review only

1  
2  
3  
4  
5  
6  
7  
8  
9  
10  
11  
12  
13  
14  
15  
16  
17  
18  
19  
20  
21  
22  
23  
24  
25  
26  
27  
28  
29  
30  
31  
32  
33  
34  
35  
36  
37  
38  
39  
40  
41  
42  
43  
44  
45  
46  
47  
48  
49  
50  
51  
52  
53  
54  
55  
56  
57  
58  
59  
60

For peer review only

1  
2  
3  
4  
5  
6  
7  
8  
9  
10  
11  
12  
13  
14  
15  
16  
17  
18  
19  
20  
21  
22  
23  
24  
25  
26  
27  
28  
29  
30  
31  
32  
33  
34  
35  
36  
37  
38  
39  
40  
41  
42  
43  
44  
45  
46  
47  
48  
49  
50  
51  
52  
53  
54  
55  
56  
57  
58  
59  
60

For peer review only

## STROBE Statement—checklist of items that should be included in reports of observational studies

|                              | Item No | Recommendation                                                                                                                                                                                                                                                                                                                                  |
|------------------------------|---------|-------------------------------------------------------------------------------------------------------------------------------------------------------------------------------------------------------------------------------------------------------------------------------------------------------------------------------------------------|
| <b>Title and abstract</b>    | 1       | (a) Indicate the study's design with a commonly used term in the title or the abstract<br><b>Title: Predictors of health literacy in multimorbid patients in primary care: a cross-sectional study in Switzerland.</b><br>(b) Provide in the abstract an informative and balanced summary of what was done and what was found<br><b>p. 3 -4</b> |
| <b>Introduction</b>          |         |                                                                                                                                                                                                                                                                                                                                                 |
| Background/rationale         | 2       | Explain the scientific background and rationale for the investigation being reported<br><b>p.5</b>                                                                                                                                                                                                                                              |
| Objectives                   | 3       | State specific objectives, including any prespecified hypotheses<br><b>pp. 6</b>                                                                                                                                                                                                                                                                |
| <b>Methods</b>               |         |                                                                                                                                                                                                                                                                                                                                                 |
| Study design                 | 4       | Present key elements of study design early in the paper<br><b>p. 7</b>                                                                                                                                                                                                                                                                          |
| Setting                      | 5       | Describe the setting, locations, and relevant dates, including periods of recruitment, exposure, follow-up, and data collection<br><b>p. 7</b>                                                                                                                                                                                                  |
| Participants                 | 6       | <i>Cross-sectional study</i> —Give the eligibility criteria, and the sources and methods of selection of participants<br><b>p.7</b>                                                                                                                                                                                                             |
| Variables                    | 7       | Clearly define all outcomes, exposures, predictors, potential confounders, and effect modifiers. Give diagnostic criteria, if applicable<br><b>p. 7-10</b>                                                                                                                                                                                      |
| Data sources/<br>measurement | 8*      | For each variable of interest, give sources of data and details of methods of assessment (measurement). Describe comparability of assessment methods if there is more than one group<br><b>pp. 7-10</b>                                                                                                                                         |
| Bias                         | 9       | Describe any efforts to address potential sources of bias<br><b>p. 7</b>                                                                                                                                                                                                                                                                        |
| Study size                   | 10      | Explain how the study size was arrived at<br><b>p. 7</b>                                                                                                                                                                                                                                                                                        |
| Quantitative variables       | 11      | Explain how quantitative variables were handled in the analyses. If applicable, describe which groupings were chosen and why<br><b>p. 8</b>                                                                                                                                                                                                     |
| Statistical methods          | 12      | (a) Describe all statistical methods, including those used to control for confounding<br><b>pp. 10</b><br>(b) Describe any methods used to examine subgroups and interactions<br><b>pp. 10</b><br>(c) Explain how missing data were addressed<br><b>p. 10</b><br>(d) Describe any sensitivity analyses<br><b>p. 10</b>                          |

Continued on next page

**Results**

|                          |     |                                                                                                                                                                                                                                |
|--------------------------|-----|--------------------------------------------------------------------------------------------------------------------------------------------------------------------------------------------------------------------------------|
| Participants             | 13* | (a) Report numbers of individuals at each stage of study—eg numbers potentially eligible, examined for eligibility, confirmed eligible, included in the study, completing follow-up, and analysed<br><b>p. p.10</b>            |
|                          |     | (b) Give reasons for non-participation at each stage<br><b>p. 10</b>                                                                                                                                                           |
|                          |     | (c) Consider use of a flow diagram                                                                                                                                                                                             |
| Descriptive data         | 14* | (a) Give characteristics of study participants (eg demographic, clinical, social) and information on exposures and potential confounders<br><b>Table 1</b>                                                                     |
|                          |     | (b) Indicate number of participants with missing data for each variable of interest<br><b>Table 1 and p 11</b>                                                                                                                 |
| Outcome data             | 15* | <i>Cross-sectional study</i> —Report numbers of outcome events or summary measures<br><b>P 11</b>                                                                                                                              |
| Main results             | 16  | (a) Give unadjusted estimates and, if applicable, confounder-adjusted estimates and their precision (eg, 95% confidence interval). Make clear which confounders were adjusted for and why they were included<br><b>Table 1</b> |
|                          |     | (b) Report category boundaries when continuous variables were categorized                                                                                                                                                      |
|                          |     | (c) If relevant, consider translating estimates of relative risk into absolute risk for a meaningful time period                                                                                                               |
| Other analyses           | 17  | Report other analyses done—eg analyses of subgroups and interactions, and sensitivity analyses<br><b>Tables 2 and 3</b>                                                                                                        |
| <b>Discussion</b>        |     |                                                                                                                                                                                                                                |
| Key results              | 18  | Summarise key results with reference to study objectives<br><b>p. 13</b>                                                                                                                                                       |
| Limitations              | 19  | Discuss limitations of the study, taking into account sources of potential bias or imprecision. Discuss both direction and magnitude of any potential bias<br><b>p. 16</b>                                                     |
| Interpretation           | 20  | Give a cautious overall interpretation of results considering objectives, limitations, multiplicity of analyses, results from similar studies, and other relevant evidence<br><b>pp. 17</b>                                    |
| Generalisability         | 21  | Discuss the generalisability (external validity) of the study results                                                                                                                                                          |
| <b>Other information</b> |     |                                                                                                                                                                                                                                |
| Funding                  | 22  | Give the source of funding and the role of the funders for the present study and, if applicable, for the original study on which the present article is based<br><b>p. 18</b>                                                  |

\*Give information separately for cases and controls in case-control studies and, if applicable, for exposed and unexposed groups in cohort and cross-sectional studies.

**Note:** An Explanation and Elaboration article discusses each checklist item and gives methodological background and published examples of transparent reporting. The STROBE checklist is best used in conjunction with this article (freely available on the Web sites of PLoS Medicine at <http://www.plosmedicine.org/>, Annals of Internal Medicine at <http://www.annals.org/>, and Epidemiology at <http://www.epidem.com/>). Information on the STROBE Initiative is available at [www.strobe-statement.org](http://www.strobe-statement.org).

# BMJ Open

## Factors associated with health literacy in multimorbid patients in primary care: a cross sectional study in Switzerland

|                                 |                                                                                                                                                                                                                                                                                                                                                                                                                                                                                                                                                                                                                                                                                                                                                                                                                                                                                                                             |
|---------------------------------|-----------------------------------------------------------------------------------------------------------------------------------------------------------------------------------------------------------------------------------------------------------------------------------------------------------------------------------------------------------------------------------------------------------------------------------------------------------------------------------------------------------------------------------------------------------------------------------------------------------------------------------------------------------------------------------------------------------------------------------------------------------------------------------------------------------------------------------------------------------------------------------------------------------------------------|
| Journal:                        | <i>BMJ Open</i>                                                                                                                                                                                                                                                                                                                                                                                                                                                                                                                                                                                                                                                                                                                                                                                                                                                                                                             |
| Manuscript ID                   | bmjopen-2017-018281.R2                                                                                                                                                                                                                                                                                                                                                                                                                                                                                                                                                                                                                                                                                                                                                                                                                                                                                                      |
| Article Type:                   | Research                                                                                                                                                                                                                                                                                                                                                                                                                                                                                                                                                                                                                                                                                                                                                                                                                                                                                                                    |
| Date Submitted by the Author:   | 25-Dec-2017                                                                                                                                                                                                                                                                                                                                                                                                                                                                                                                                                                                                                                                                                                                                                                                                                                                                                                                 |
| Complete List of Authors:       | N'GORAN, A. Alexandra; Institute of Family Medicine University of Lausanne Switzerland;<br>Pasquier, Jérôme; Institute of Social and Preventive Medicine, Lausanne University Hospital, Lausanne, Switzerland,<br>Deruaz-Luyet, Anouk; University of Lausanne, Institute of Family Medicine University of Lausanne, Switzerland<br>Burnand, Bernard; CHUV, Institute of Social and Preventive Medicine<br>Haller, Dagmar; Primary Care Unit, Faculty of Medicine, University of Geneva<br>Neuner-Jehle, Stefan; Institute of Primary Care, University of Zurich, University Hospital of Zurich<br>Zeller, Andreas; Institute of Primary Health Care, University of Basel, Switzerland<br>Streit, Sven; Institute of Primary Health Care BIHAM,<br>Herzig, Lilli; University of Lausanne, Institute of General Medicine<br>Bodenmann, Patrick; University of Lausanne, Departement of Ambulatory Care and Community Medicine |
| <b>Primary Subject Heading</b>: | General practice / Family practice                                                                                                                                                                                                                                                                                                                                                                                                                                                                                                                                                                                                                                                                                                                                                                                                                                                                                          |
| Secondary Subject Heading:      | Public health                                                                                                                                                                                                                                                                                                                                                                                                                                                                                                                                                                                                                                                                                                                                                                                                                                                                                                               |
| Keywords:                       | GENERAL MEDICINE (see Internal Medicine), PRIMARY CARE, PUBLIC HEALTH                                                                                                                                                                                                                                                                                                                                                                                                                                                                                                                                                                                                                                                                                                                                                                                                                                                       |
|                                 |                                                                                                                                                                                                                                                                                                                                                                                                                                                                                                                                                                                                                                                                                                                                                                                                                                                                                                                             |

SCHOLARONE™  
Manuscripts

1  
2  
3 **Factors associated with health literacy in multimorbid patients in primary care: a cross-**  
4 **sectional study in Switzerland.**  
5  
6

7  
8 *Running title:* Health literacy in multimorbid patients  
9

10  
11 Alexandra A. N'Goran\*<sup>1</sup>, MD, MPH; Jérôme Pasquier<sup>3</sup>, PhD; Anouk Déruaz-Luyet<sup>1</sup>, PhD;  
12  
13 Bernard Burnand<sup>3</sup>, MD, MPH; Dagmar M Haller<sup>4</sup>, MD, PhD; Stefan Neuner-Jehle<sup>5</sup>, MD, MPH;  
14  
15 Andreas Zeller<sup>6</sup>, MD, MSc; Sven Streit<sup>7</sup>, MD; Lilli Herzig<sup>#1</sup>, MD; and Patrick Bodenmann<sup>#2</sup>,  
16  
17 MD, MSc.  
18  
19

20  
21  
22 <sup>1</sup> Institute of Family Medicine, University of Lausanne, Switzerland.  
23

24  
25 <sup>2</sup> Department of Ambulatory Care and Community Medicine, Lausanne University Hospital,  
26  
27 Switzerland.  
28

29  
30 <sup>3</sup> Institute of Social and Preventive Medicine, Lausanne University Hospital, Switzerland.  
31

32  
33 <sup>4</sup> Primary Care Unit, Faculty of Medicine, University of Geneva, Switzerland.  
34

35  
36 <sup>5</sup> Institute of Primary Care, University of Zurich, Switzerland.  
37

38  
39 <sup>6</sup> Centre for Primary Health Care, University of Basel, Switzerland.  
40

41  
42 <sup>7</sup> Institute of Primary Health Care (BIHAM), University of Bern, Switzerland.  
43

44  
45  
46 <sup>#</sup>These authors contributed equally  
47

48  
49 **\*Corresponding author and guarantor:**  
50

51  
52 Lilli Herzig, MD  
53

54  
55 Institute of Family Medicine, University of Lausanne  
56



1  
2  
3 Rue du Bugnon 44  
4  
5

6 1011 Lausanne  
7  
8

9 Switzerland  
10  
11

12 Phone: + 41 21 314 61 15 / Fax: +41 21 314 75 90  
13  
14

15 Email: lilli.herzig@hin.ch  
16  
17

18 **Word count:** 3177 words  
19  
20

21 **Number of tables:** 3  
22  
23

24 **Number of references:** 57  
25  
26  
27  
28  
29  
30  
31  
32  
33  
34  
35  
36  
37  
38  
39  
40  
41  
42  
43  
44  
45  
46  
47  
48  
49  
50  
51  
52  
53  
54  
55  
56  
57  
58  
59  
60

## Abstract

**Objective:** To identify factors associated with health literacy in multimorbid patients.

**Design:** A nationwide cross-sectional study in Switzerland. Univariate and multivariate linear regressions were calculated to identify variables associated with health literacy. A multiple imputation approach was used to deal with missing values.

**Participants:** Multimorbid patients recruited in primary care settings (N=888), above 18 years old and suffering from at least three of the 75 chronic conditions on a predefined list based on the ICPC-2.

**Main measures:** Health literacy was assessed using the European Health Literacy Survey project questionnaire (HLS-EU 6). This comprises six items scored from 1 to 4 (*very difficult* = 1, *fairly difficult* = 2, *fairly easy* = 3, *very easy* = 4), and the total health literacy score is computed as their mean. As we wished to understand the determinants associated with lower health literacy, the HLS-EU 6 score was the only dependent variable; all other covariates were considered independent.

**Results:** The mean health literacy score (SD) was 2.9 (0.5). Multivariate analyses found significant associations between low health literacy scores and: treatment burden scores ( $\beta = -0.004$ , 95% CI: [-0.006; -0.002]); marital status, predominantly the divorced group ( $\beta = 0.136$ , 95% CI: [0.012; 0.260]); dimensions of the EQ5D3L quality of life assessment, i.e. for moderate problems with mobility ( $\beta = -0.086$ , 95% CI: [-0.157; -0.016]); and with moderate problems ( $\beta = -0.129$ , 95% CI: [-0.198; -0.060]) and severe problems with anxiety/depression ( $\beta = -0.343$ , 95% CI: [-0.500; -0.186]).

1  
2  
3 **Conclusions:** Multimorbid patients with a high treatment burden, altered quality of life by  
4 problems with mobility, anxiety or depression, often also have low levels of health literacy.  
5  
6 Primary care practitioners should therefore pay particular attention to these patients in their daily  
7  
8 practice.  
9  
10

11  
12  
13 **Keywords:** Health literacy, Multimorbidity, Primary care, Chronic disease, Switzerland.  
14  
15

### 16 **Article summary, Strengths and limitations**

- 17
- 18
- 19 • This national primary care study enabled the analysis of data from a sample of
- 20 multimorbid patients
- 21
- 22
- 23
- 24 • The first study to understand factors associated with health literacy in multimorbid
- 25 patients in primary care settings
- 26
- 27
- 28
- 29 • Only multimorbid patients with at least three chronic conditions were assessed
- 30
- 31 • Causal relationships could not be inferred due to the study design
- 32
- 33
- 34
- 35
- 36
- 37
- 38
- 39
- 40
- 41
- 42
- 43
- 44
- 45
- 46
- 47
- 48
- 49
- 50
- 51
- 52
- 53
- 54
- 55
- 56
- 57
- 58
- 59
- 60

## Introduction

Multimorbidity, defined as the occurrence of multiple chronic medical conditions in one individual (1-3), is a steadily increasing phenomenon due to population ageing (4, 5).

Multimorbid patients must face many challenges: more frequent and longer hospitalisations (6, 7), greater use of polypharmacy (causing adverse drug effects) (8, 9), higher expenditure on healthcare (10-12) and the use of a broader range of healthcare services (8, 10). Moreover, as the number of health professionals involved in treatment increases, the more likely patients will be faced with fragmented medical care due to conflicting instructions and care pathways. This makes piecing together and adhering to instructions even more testing and thus prevents patients from participating effectively in their own care (8, 10, 12). Facing all these challenges effectively requires good levels of health literacy. The U.S. Institute of Medicine defines health literacy as “the degree to which individuals have the capacity to obtain, process and understand basic health information and services needed to make appropriate health decisions” (13, 14). Health literacy includes a broad set of skills (i.e. reading, writing, numeracy, communication and, increasingly, the use of digital technologies) needed to make appropriate health decisions and successfully navigate the healthcare system (15). Health literacy is recognized as an important determinant of health (16-18). Studies have shown that lower health literacy is associated with a lower mental and physical health status, adverse disease-specific outcomes, higher mortality, and more use of healthcare but less use of preventive care (17, 19). Consequently, governments, researchers, clinicians and patients’ associations are paying ever more attention to research into health literacy (20).

Effective patient–clinician communication that ensures patients are able to understand the health information and treatment recommendations they receive and feel comfortable enough to ask

1  
2  
3 questions or admit when they do not understand something, is vital to the successful  
4  
5 management of a chronic illness (21). Healthcare providers should be conscious of their patients'  
6  
7 health literacy skills so as to ensure that health information is communicated effectively to help  
8  
9 manage long-term conditions (22, 23). Additionally, health literacy is a prerequisite for patient  
10  
11 activation and shared decision-making (24-26). Thus, identifying factors associated with low  
12  
13 health literacy is an important step towards devising effective engagement, prevention and  
14  
15 intervention strategies for patients in primary care (20). The literature shows that health literacy  
16  
17 has been assessed in different ways and with contrasting conclusions: e.g. different studies  
18  
19 looking at the factors influencing health literacy among less well-educated young people showed  
20  
21 a relationship between low health literacy and socioeconomic factors (17, 27, 28). One study  
22  
23 evaluating relevant associations between health literacy and multimorbidity (defined as two or  
24  
25 more chronic diseases from a list of 11 conditions) in primary care, found none (14). To better  
26  
27 understand the determinants associated with low health literacy, the present study aimed to  
28  
29 explore all the factors that might be associated with low health literacy in multimorbid patients in  
30  
31 primary care with at least three chronic conditions.  
32  
33  
34  
35  
36  
37  
38  
39  
40  
41  
42  
43  
44  
45  
46  
47  
48  
49  
50  
51  
52  
53  
54  
55  
56  
57  
58  
59  
60

## Methods

### *1. Participants and procedures*

We analysed data (N = 888) from a national cross-sectional survey conducted in collaboration with Switzerland's five academic institutes of family medicine, between January and September 2015. The study was designed to assess multimorbidity in patients in a primary care setting in order to target a population whose management is more challenging to general practitioners (GPs). The detailed study protocol, dataset description and initial results have been published elsewhere (29, 30).

A convenience sample of 100 GPs randomly enrolled patients from their practices who consulted them during the study period. Each GP was provided with a randomisation calendar specifying which patients to enroll on each half-day during the recruitment weeks. All multimorbid patients above 18 years old and suffering from at least three of the 75 chronic conditions on a predefined list, based on the International Classification of Primary Care 2 (ICPC-2), were considered eligible (31, 32) and gave written informed consent to participate in the study. GPs completed a paper-based questionnaire for each included patient (patient-related variables assessed through the GP survey). Patients enrolled completed a telephone-based questionnaire. The study protocol (Protocol No 314/15) was approved by the Human Research Ethics Committee of the Canton Vaud, Switzerland.

### *2. Measures*

#### *2.1 Health literacy*

1  
2  
3 Health literacy was assessed using the validated six-item questionnaire from the European Health  
4 Literacy Survey project (HLS-EU 6) (33, 34). The HLS-EU was a Europe-wide project  
5 developed to gather data on health literacy (33). The original HLS-EU 47 explored three  
6 domains: 1. healthcare; 2. disease prevention; and 3. health promotion. Each domain explored  
7 four matrices: accessing/obtaining information; understanding information; processing/  
8 appraising information; and applying/using information. The HLS-EU 6 is a validated short form  
9 with two of the original questions remaining in each domain (33-35). Validated French and  
10 German versions of the HLS-EU 6 were available by the authors (34). We used this shorter,  
11 validated questionnaire because the present study's main objective was to measure overall levels  
12 of health literacy in multimorbid patients, not to assess health literacy in detail. The HLS-EU 6  
13 scale consists of six items with five possible responses. Participants were asked to respond to the  
14 following questions. How easy or difficult is it for you to: (a) judge when you may need to get a  
15 second opinion from another doctor? (b) use information the doctor gives you to make decisions  
16 about your illness? (c) find information on how to manage mental health problems like stress or  
17 depression? (d) judge whether the information on health risks in the media is reliable? (e) find  
18 out about activities that are good for your mental wellbeing? and (f) understand information in  
19 the media on how to get healthier? The possible responses and their scores were as follows: *very*  
20 *difficult* = 1, *fairly difficult* = 2, *fairly easy* = 3, *very easy* = 4, and a fifth alternative for when  
21 participants did not answer or did not have a definite answer, coded as a missing value. The  
22 health literacy score was thus calculated as the mean of the six health literacy items, scored from  
23 1 to 4, after imputation of the missing values (see the Statistical Analyses section below) (34).  
24  
25  
26  
27  
28  
29  
30  
31  
32  
33  
34  
35  
36  
37  
38  
39  
40  
41  
42  
43  
44  
45  
46  
47  
48  
49  
50  
51  
52  
53

## 54 2.2 Covariates

55  
56  
57  
58  
59  
60

All the variables have been described elsewhere previously (29). Briefly, our analyses used the following variables:

2.2.1 Dependent variable: as we wished to understand the determinants associated with lower health literacy scores, we chose the HLS-EU as the dependent variable.

2.2.2 Independent variables: included all other variables (based on GP and patient questionnaires).

- Age
- Sex (female/male)

GP's questionnaire, based on his medical records:

- number of chronic conditions based on a predefined list of 75 chronic conditions relevant to multimorbidity and coded according to the ICPC 2
- number of drugs (0–4, 5–6, 7–9 or  $\geq 10$ ) listed by organic system (general, blood, immune, digestive, cardiovascular, respiratory, neurological, endocrine, eye, ear, psychological, musculoskeletal) and by substance
- number of medical visits in the last year
- number of hospitalisations in the last year
- the severity index (SI) (36-38) was derived by dividing the total cumulative illness rating scale (CIRS) score, a validated questionnaire published elsewhere in detail (39), by the number of categories with morbidities

Patient interview (based on a questionnaire):

- marital status (single, married, divorced or widowed)



- 1
- 2
- 3 - educational level (primary, secondary and tertiary)
- 4
- 5
- 6 - Dipcare questionnaire for deprivation assessment, containing 16 items examining the
- 7 three dimensions of deprivation (material, social and health), and validated for the Swiss
- 8 population and published elsewhere in detail (40)
- 9
- 10
- 11
- 12 - treatment burden questionnaire (TBQ), recently developed to produce a score for the
- 13 overall burden related to the treatment of chronic conditions (41); it consists of 13
- 14 questions to rate with an answer between 0 and 10, with 0 corresponding to *no burden*
- 15 and 10 to *a very important/considerable burden*
- 16
- 17
- 18
- 19
- 20
- 21 - medical help from a home nurse
- 22
- 23
- 24 - *paramedical therapist* grouped together physiotherapist and/or occupational therapist
- 25 (yes/no)
- 26
- 27
- 28 - homecare (yes/no)
- 29
- 30
- 31 - number of specialists involved in patient's care
- 32
- 33 - EQ5D3L composed of five dimensions of health (mobility, self-care, usual activities,
- 34 pain/discomfort and anxiety/depression) and used a visual analogue scale
- 35
- 36
- 37
- 38
- 39

### 40 3. *Statistical analyses*

41

42

43 On collecting the questionnaires, the number of values missing from our variable of interest

44 (health literacy score) was considered too high (i.e. the health literacy score could not be

45 computed in full for 577 participants) to reasonably analyse each participant's case in its entirety.

46

47

48 We first considered computing the health literacy scores for all participants with at least five

49 non-missing items. However, even then, the number of missing scores remained too high (377

50 participants), and comparisons between complete and the incomplete sets of responses showed

51

52

53

54

55

56

57

58

59

60

1  
2  
3 significant differences in several covariates (data not shown). We therefore opted for the  
4  
5 imputation of the values missing from the health literacy items and demographic covariates by  
6  
7 using the multiple imputation approach developed by Rubin (42). As a sensitivity analysis, we  
8  
9 carried out a complete case analysis, and this gave similar results.  
10  
11  
12  
13  
14

15 We calculated means and standard deviations for quantitative variables, and frequencies and  
16  
17 proportions for categorical ones. Univariate and multivariate linear regressions were carried out  
18  
19 to identify variables of health literacy. Using sensitivity analysis, we checked whether a model  
20  
21 without imputations would produce the same results as the model with multiple imputations:  
22  
23 analysis with and without imputation gave similar results.  
24  
25  
26  
27

28 All analyses were performed using R software version 3.3.2 (43) and the MICE package version  
29  
30 2.29 (44).  
31  
32

## 33 **Results**

### 34 *Descriptive analyses*

35  
36  
37 Cases with at least one missing value among the six items were considered incomplete (239, 18,  
38  
39 417, 168, 252 and 175 missing values for questions (a) to (f), respectively). Of the original 888  
40  
41 patients, 200, 175, 117, 59, 24 and 2 had, respectively, 1, 2, 3, 4, 5 and 6 missing HL variables.  
42  
43 Thus a complete HL score was only computable for 311 respondents (35%), and we therefore  
44  
45 chose to impute the missing values.  
46  
47  
48  
49

50 The mean age (SD) of the participants was 72.9 (12.0) years old; 52.0% were women. Almost  
51  
52 half of the participants were married (49.0%), and 40.0% had a tertiary level of education. The  
53  
54 mean (SD) number of chronic conditions was 7.20 (2.9), and the mean (SD) number of medical  
55  
56  
57  
58  
59  
60

1  
2  
3 visits in the last year was 12.90 (8.7). The mean health literacy score (SD) of the participants was  
4  
5 2.9 (0.5). Descriptive statistics are summarized in Table 1.  
6  
7  
8  
9

10 *Insert table 1 about here*  
11  
12  
13

14 In bivariate analyses with imputation, we found significant relationships between health literacy  
15 and almost all the covariates except for the number of chronic conditions, number of drugs,  
16 number of medical visits in the last year, number of hospitalisations in the last year, homecare,  
17 nurse, and severity index (Table 2).  
18  
19  
20  
21  
22  
23

24  
25  
26 *Insert table 2 about here*  
27  
28  
29  
30

31 The multivariate analyses showed significant relationships between health literacy and: the  
32 treatment burden score ( $\beta = -0.004$ , 95% CI: [-0.006; -0.002]); marital status, but particularly for  
33 the divorced group ( $\beta = 0.136$ , 95% CI: [0.012; 0.260]); dimensions of the EQ5D3L quality of  
34 life assessment, i.e. moderate problems with mobility and moderate and severe problems with  
35 anxiety/depression ( $\beta = -0.086$ , 95% CI: [-0.157; -0.016]), ( $\beta = -0.129$ , 95% CI: [-0.198; -0.060]),  
36 and ( $\beta = -0.343$ , 95% CI: [-0.500; -0.186]), respectively. Table 3 shows the results of these  
37  
38  
39  
40  
41  
42  
43  
44  
45  
46  
47  
48  
49  
50  
51  
52  
53  
54  
55  
56  
57  
58  
59  
60

*Insert table 3 about here*

## Discussion

The present study showed that the mean (SD) health literacy score in our multimorbid primary care patient sample was 2.9 (0.5). In multimorbid patients, a high treatment burden and effects on patients' quality of life due to problems with mobility and anxiety/depression were negatively associated with health literacy. However, our study revealed no association between HL and age. Although several studies have assessed health literacy, to the best of our knowledge, little is known about which factors are associated with low health literacy in multimorbid patients in primary care.

The present study's main finding was that the treatment burden facing multimorbid primary care patients was negatively associated with health literacy. In other words, the lower a multimorbid patient's health literacy, the higher the treatment burden. This is a very interesting finding, and although the  $\beta$  coefficient is small, we believe that this result is clinically relevant and allows us to identify treatment burden as an element to take into account for potentially low literacy in multimorbid patients.

There are no specific references to explain the association found between health literacy and the burden of treatment. As a proxy for treatment burden, some authors have described an association between low health literacy and treatment adherence (45, 46), however, others found no evidence for such an association (47, 48). Our exploratory study was unable to determine any causal association between the treatment burden and health literacy. But our results could also be considered from another angle, that has been taken in other analyses. Indeed, individuals with low health literacy are usually less well educated and belong to lower socioeconomic groups (18). Multimorbidity is higher in these groups and patients in them are likely to suffer more

1  
2  
3 severely and from more diseases, leading to a higher treatment burden. Furthermore, low health  
4 literacy, used as an independent variable, has been found to be associated with a reduced ability  
5  
6 of adults with coronary heart disease to identify medication (49), poor health outcomes (14, 19,  
7  
8 50), and a more significant use of healthcare (51). These three factors can also be linked to  
9  
10 multimorbidity and may have an impact on the overall treatment burden.  
11  
12  
13  
14

15  
16 Another important finding was that patients whose quality of life had been altered by problems  
17 related to anxiety/depression or mobility were more likely to have low levels of health literacy..  
18  
19 As described by DiMatteo, anxiety and depression may affect patients' motivation and ability  
20  
21 (52) to seek out and understand information about their diseases and treatment, resulting in a  
22  
23 lower level of health literacy, especially in the complex context of multimorbidity. Moreover,  
24  
25 anxiety and depression may well be higher when patients have to face up to more numerous  
26  
27 health problems, especially in multimorbidity. This result is not concordant with the study by  
28  
29 Green et al. (53), which found no association between limited health literacy and depression in  
30  
31 patients receiving chronic hemodialysis treatment, but this difference might be explained by the  
32  
33 differences in the study populations, how health literacy was assessed and the fact that his study  
34  
35 used health literacy as independent variable.  
36  
37  
38  
39  
40

41 Concerning the association between mobility problems and low health literacy, Matsumoto et al.  
42  
43 describes a relationship with different social determinants of health such as housing,  
44  
45 employment, transport or social support (54). On the other hand, in a very different population,  
46  
47 there was a strong association between low health literacy and obesity in young children with a  
48  
49 described lack of physical activity (55). However, we can only speculate as to whether there is  
50  
51 any precise explanation of the associations between anxiety, depression, mobility and health  
52  
53  
54  
55  
56  
57  
58  
59  
60

1  
2  
3 literacy. Furthermore, due to its design, the study's findings cannot determine a causal  
4  
5 association.  
6  
7

8 Anxiety, depression and mobility are just some of the determinants of quality of life, and the  
9  
10 literature reveals very controversial results concerning the association between health literacy  
11  
12 and quality of life. It seems that such associations may depend on certain other aspects, such as  
13  
14 specific chronic diseases or the cultural characteristics of the population studied (56). Thus,  
15  
16 although we found that some of the determinants of quality of life are factors associated with low  
17  
18 health literacy, we believe that further studies are necessary to better understand the underlying  
19  
20 reasons for the controversial results in the literature. However, it nevertheless seems important to  
21  
22 describe factors associated with low health literacy, thus allowing GPs to better identify such  
23  
24 patients and to adapt how they inform them about medical problems.  
25  
26  
27  
28  
29

30 The present study found no association between the level of health literacy of multimorbid  
31  
32 primary care patients and their use of healthcare services, especially with regards to the number  
33  
34 of consultations with their GP or the number of hospitalisations in the past year. Results in the  
35  
36 literature are inconsistent. The study by Vandenbosch et al. (51) found no significant  
37  
38 associations between health literacy and the number of medical visits or hospitalisations,  
39  
40 whereas a study by Duong et al. (57) described an association between health literacy and  
41  
42 healthcare use. These results are inconsistent due to differences in the study populations (i.e. our  
43  
44 study population was composed of multimorbid patients in primary care settings) and  
45  
46 methodologies (other studies considered health literacy as an independent variable). Indeed, we  
47  
48 suggest that health literacy in multimorbid patients is different from that in the general  
49  
50 population and should be assessed differently. Further research should aim to clearly confirm or  
51  
52 invalidate our results with multimorbid patients.  
53  
54  
55  
56  
57  
58  
59  
60

### Strength and limitations:

This national primary care study enabled the analysis of data from a relatively representative sample of multimorbid patients suffering from at least three chronic conditions and enrolled in GPs' practices across Switzerland. Although several studies have previously assessed health literacy, to the best of our knowledge, this was the first to have assessed factors associated with health literacy in multimorbid patients in a primary care setting.

However, this study had some limitations. First, the beta coefficients were small, making clinical interpretation difficult, despite the fact that the study gives an overall view of the factors associated with health literacy. Further studies should be done to confirm these trends.

Second, our sample might not be perfectly representative of all multimorbid patients. GPs only recruited patients who came to their practices and who were suffering from at least three chronic conditions from a list of 75 provided to them. The most impaired multimorbid patients, therefore, those with the most extensive mobility problems (i.e. those cared for via homecare visits, in nursing homes, or hospitalised) were not included (selection bias). Our results concerning health literacy in multimorbid patients should thus be interpreted with caution, taking into consideration multimorbid patients who cannot attend GPs' practices or who have rare chronic conditions. Furthermore, we cannot exclude a potential selection bias, as patients who consulted more frequently had a higher chance of being included. However, we found no association between the frequency of consultations and health literacy in our final model.

Third, the health literacy score contained a lot of missing values, and we cannot exclude that the cause of that missing data was related to health literacy itself. However, we examined whether

1  
2  
3 the mean of the available HL items was associated with the number of missing HL items, and  
4  
5 this was not the case.  
6  
7

8 Fourth, due to the study's cross-sectional design, causal relationships cannot be inferred.  
9  
10  
11  
12  
13  
14

## 15 **Conclusion**

16  
17  
18 The present study highlights factors associated with health literacy in multimorbid patients in  
19 primary care: a high treatment burden, altered quality of life by problems with anxiety or  
20 depression and poor mobility were associated with a low level of health literacy. This is a useful  
21 information that could guide GPs in their daily practice and help them to better identify patients  
22 at risk of having low health literacy. Even though, with the current state of knowledge, we  
23 cannot demonstrate causal relationships between multimorbidity and the treatment burden, GPs  
24 should carefully weigh up how best to transmit clinical information to patients whom they  
25 believe to be at risk of low health literacy.  
26  
27  
28  
29  
30  
31  
32  
33  
34  
35  
36

## 37 **Funding**

38  
39  
40 This work was supported by Swiss University Conference project P10, which granted funding to  
41 reinforce teaching and research in Primary Care in Switzerland. Within the framework of this  
42 financial support, Switzerland's five university institutes of family medicine (in Basel, Bern,  
43 Geneva, Lausanne and Zurich) collaborate as the Swiss Academy of Family Medicine  
44 (SAFMED). The funding source had no role in study design, data collection, analysis or  
45 interpretation, nor in the preparation of the manuscript and the decision to submit the paper for  
46 publication.  
47  
48  
49  
50  
51  
52  
53  
54  
55  
56  
57  
58  
59  
60



## **Acknowledgement**

The authors are grateful to all the GPs and patients for their extensive participation.

## **Conflict of interest:**

The authors declare no conflicts of interest.

## **Authors' contributions**

AAN, ADL, BB, DMH, AZ, LH and PB developed the protocol for the MMFM study. LH, AZ and DMH ensured the recruitment of participating GPs. AAN was primarily responsible for planning the analysis and drafting the manuscript. JP was responsible for the analyses. PB, JP and LH helped to improve the manuscript during this process. BB, AD, DMH, SS, SNJ, AZ, PB and LH made contributions to the interpretation of the findings and the content of the final manuscript. All authors read and approved the final manuscript.

## **Data Sharing Statement**

Data are available at family medicine institute of Lausanne.

## REFERENCES

1. Uijen AA, van de Lisdonk EH. Multimorbidity in primary care: prevalence and trend over the last 20 years. *The European journal of general practice*. 2008;14(sup1):28-32.
2. Valderas JM, Starfield B, Sibbald B, Salisbury C, Roland M. Defining comorbidity: implications for understanding health and health services. *The Annals of Family Medicine*. 2009;7(4):357-63.
3. van den Akker M, Buntinx F, Metsemakers JF, Roos S, Knottnerus JA. Multimorbidity in general practice: prevalence, incidence, and determinants of co-occurring chronic and recurrent diseases. *J Clin Epidemiol*. 1998;51(5):367-75.
4. Goodman RA. Defining and measuring chronic conditions: imperatives for research, policy, program, and practice. *Preventing chronic disease*. 2013;10.
5. Heyworth IT, Hazell ML, Linehan MF, Frank TL. How do common chronic conditions affect health-related quality of life? *Br J Gen Pract*. 2009;59(568):e353-e8.
6. Condelius A, Edberg A-K, Jakobsson U, Hallberg IR. Hospital admissions among people 65+ related to multimorbidity, municipal and outpatient care. *Archives of gerontology and geriatrics*. 2008;46(1):41-55.
7. Smith SM, O'Dowd T. Chronic diseases: what happens when they come in multiples? : *British Journal of General Practice*; 2007.
8. Vogeli C, Shields AE, Lee TA, Gibson TB, Marder WD, Weiss KB, et al. Multiple chronic conditions: prevalence, health consequences, and implications for quality, care management, and costs. *Journal of general internal medicine*. 2007;22(3):391-5.
9. Wehling M. Multimorbidity and polypharmacy: how to reduce the harmful drug load and yet add needed drugs in the elderly? Proposal of a new drug classification: fit for the aged. *Journal of the American Geriatrics Society*. 2009;57(3):560-1.
10. Bayliss EA, Edwards AE, Steiner JF, Main DS. Processes of care desired by elderly patients with multimorbidities. *Family Practice*. 2008;25(4):287-93.
11. Bodenheimer T, Fernandez A. High and rising health care costs. Part 4: can costs be controlled while preserving quality? *Annals of Internal Medicine*. 2005;143(1):26-31.
12. Taylor AW, Price K, Gill TK, Adams R, Pilkington R, Carrangis N, et al. Multimorbidity-not just an older person's issue. Results from an Australian biomedical study. *BMC public health*. 2010;10(1):718.
13. Kindig DA, Panzer AM, Nielsen-Bohlman L. *Health literacy: a prescription to end confusion*: National Academies Press; 2004.
14. Hudon C, Fortin M, Poitras M-E, Almirall J. The relationship between literacy and multimorbidity in a primary care setting. *BMC family practice*. 2012;13(1):33.
15. Hersh L, Salzman B, Snyderman D. *Health Literacy in Primary Care Practice*. *American family physician*. 2015;92(2).
16. Bennett IM, Chen J, Soroui JS, White S. The contribution of health literacy to disparities in self-rated health status and preventive health behaviors in older adults. *The Annals of Family Medicine*. 2009;7(3):204-11.
17. van der Heide I, Uiters E, Sørensen K, Röthlin F, Pelikan J, Rademakers J, et al. Health literacy in Europe: the development and validation of health literacy prediction models. *The European Journal of Public Health*. 2016;26(6):906-11.
18. van der Heide I, Wang J, Droomers M, Spreeuwenberg P, Rademakers J, Uiters E. The relationship between health, education, and health literacy: results from the Dutch Adult Literacy and Life Skills Survey. *J Health Commun*. 2013;18 Suppl 1:172-84.
19. Berkman ND, Sheridan SL, Donahue KE, Halpern DJ, Crotty K. Low health literacy and health outcomes: an updated systematic review. *Annals of internal medicine*. 2011;155(2):97-107.

20. Friis K, Lasgaard M, Osborne RH, Maindal HT. Gaps in understanding health and engagement with healthcare providers across common long-term conditions: a population survey of health literacy in 29 473 Danish citizens. *BMJ open*. 2016;6(1):e009627.
21. Barrett SE, Puryear JS. Health literacy: improving quality of care in primary care settings. *Journal of Health Care for the Poor and Underserved*. 2006;17(4):690-7.
22. Al Sayah F, Majumdar SR, Williams B, Robertson S, Johnson JA. Health literacy and health outcomes in diabetes: a systematic review. *J Gen Intern Med*. 2013;28(3):444-52.
23. Seligman HK, Wang FF, Palacios JL, Wilson CC, Daher CA, Piette JD, et al. Physician notification of their diabetes patients' limited health literacy: A randomized, controlled trial. *J Gen Intern Med*. 2005;20(11):1077.
24. Smith SK, Nutbeam D, McCaffery KJ. Insights into the concept and measurement of health literacy from a study of shared decision-making in a low literacy population. *J Health Psychol*. 2013;18(8):1011-22.
25. Smith SG, Curtis LM, Wardle J, von Wagner C, Wolf MS. Skill set or mind set? Associations between health literacy, patient activation and health. *PLoS One*. 2013;8(9):e74373.
26. Durand MA, Carpenter L, Dolan H, Bravo P, Mann M, Bunn F, et al. Do interventions designed to support shared decision-making reduce health inequalities? A systematic review and meta-analysis. *PLoS One*. 2014;9(4):e94670.
27. Quenzel G, Schaeffer D, Messer M, Vogt D. Health literacy among less well-educated young people: Influencing factors and consequences. *Bundesgesundheitsblatt, Gesundheitsforschung, Gesundheitsschutz*. 2015;58(9):951-7.
28. Sorensen K, Pelikan JM, Rothlin F, Ganahl K, Slonska Z, Doyle G, et al. Health literacy in Europe: comparative results of the European health literacy survey (HLS-EU). *European journal of public health*. 2015;25(6):1053-8.
29. Déruaz-Luyet A, N'Goran AA, Tandjung R, Frey P, Zeller A, Haller DM, et al. Multimorbidity in primary care: protocol of a national cross-sectional study in Switzerland. *BMJ open*. 2015;5(10):e009165.
30. Deruaz-Luyet A, N'Goran AA, Senn N, Bodenmann P, Pasquier J, Widmer D, et al. Multimorbidity and patterns of chronic conditions in a primary care population in Switzerland: a cross-sectional study. *BMJ open*. 2017;7(6):e013664.
31. N'Goran AA, Blaser J, Deruaz-Luyet A, Senn N, Frey P, Haller DM, et al. From chronic conditions to relevance in multimorbidity: a four-step study in family medicine. *Family Practice*. 2016:cmw030.
32. Hofmans-Okkes IM, Lamberts H. The International Classification of Primary Care (ICPC): new applications in research and computer-based patient records in family practice. *Family practice*. 1996;13(3):294-302.
33. Consortium H-E. Comparative report of health literacy in eight EU member states. *The European health literacy survey HLS-EU*. 2012.
34. Pelikan J, Röthlin F, Ganahl K, Peer S, editors. Measuring comprehensive health literacy in general populations—le HLS-EU instruments. Presentation at the Second International Conference of Health Literacy and Health Promotion; 2014.
35. Sorensen K, Van den Broucke S, Pelikan JM, Fullam J, Doyle G, Slonska Z, et al. Measuring health literacy in populations: illuminating the design and development process of the European Health Literacy Survey Questionnaire (HLS-EU-Q). *BMC Public Health*. 2013;13:948.
36. Brett T, Arnold-Reed DE, Popescu A, Soliman B, Bulsara MK, Fine H, et al. Multimorbidity in patients attending 2 Australian primary care practices. *The Annals of Family Medicine*. 2013;11(6):535-42.
37. Miller M, Towers A. A manual of guidelines for scoring the Cumulative Illness Rating Scale for Geriatrics (CIRS-G). Pittsburgh, PA: University of Pittsburgh. 1991.

- 1
- 2
- 3 38. Miller MD, Paradis CF, Houck PR, Mazumdar S, Stack JA, Rifai AH, et al. Rating chronic medical
- 4 illness burden in geropsychiatric practice and research: application of the Cumulative Illness Rating
- 5 Scale. *Psychiatry research*. 1992;41(3):237-48.
- 6
- 7 39. Linn BS, LINN MW, Gurel L. Cumulative illness rating scale. *Journal of the American Geriatrics*
- 8 *Society*. 1968;16(5):622-6.
- 9 40. Vaucher P, Bischoff T, Diserens E-A, Herzig L, Meystre-Agustoni G, Panese F, et al. Detecting and
- 10 measuring deprivation in primary care: development, reliability and validity of a self-reported
- 11 questionnaire: the DiPCare-Q. *BMJ open*. 2012;2(1):e000692.
- 12 41. Tran V-T, Montori VM, Eton DT, Baruch D, Falissard B, Ravaud P. Development and description
- 13 of measurement properties of an instrument to assess treatment burden among patients with multiple
- 14 chronic conditions. *BMC medicine*. 2012;10(1):68.
- 15 42. Rubin R. *Multiple imputation for nonresponse in surveys* (J Wiley & Sons, New York, NY). 1987.
- 16 43. RCore T. R: A language and environment for statistical computing. R Foundation for Statistical
- 17 Computing, Vienna, Austria. Online: [http://www](http://www.R-project.org) R-project.org. 2013.
- 18 44. Buuren S, Groothuis-Oudshoorn K. mice: Multivariate imputation by chained equations in R.
- 19 *Journal of statistical software*. 2011;45(3).
- 20 45. Kalichman SC, Ramachandran B, Catz S. Adherence to combination antiretroviral therapies in
- 21 HIV patients of low health literacy. *J Gen Intern Med*. 1999;14(5):267-73.
- 22 46. Muir KW, Santiago-Turla C, Stinnett SS, Herndon LW, Allingham RR, Challa P, et al. Health
- 23 literacy and adherence to glaucoma therapy. *Am J Ophthalmol*. 2006;142(2):223-6.
- 24 47. Loke YK, Hinz I, Wang X, Salter C. Systematic review of consistency between adherence to
- 25 cardiovascular or diabetes medication and health literacy in older adults. *Ann Pharmacother*.
- 26 2012;46(6):863-72.
- 27 48. Baruel Okumura PC, Okumura LM, Reis WC, Godoy RR, Cata-Preta BO, de Souza TT, et al.
- 28 Comparing medication adherence tools scores and number of controlled diseases among low literacy
- 29 patients discharged from a Brazilian cardiology ward. *Int J Clin Pharm*. 2016;38(6):1362-6.
- 30 49. Kripalani S, Henderson LE, Chiu EY, Robertson R, Kolm P, Jacobson TA. Predictors of Medication
- 31 Self-management Skill in a Low-literacy Population. *Journal of general internal medicine*.
- 32 2006;21(8):852-6.
- 33 50. Baker DW, Parker RM, Williams MV, Clark WS, Nurss J. The relationship of patient reading ability
- 34 to self-reported health and use of health services. *American journal of public health*. 1997;87(6):1027-
- 35 30.
- 36 51. Vandenbosch J, Van den Broucke S, Vancorenland S, Avalosse H, Verniest R, Callens M. Health
- 37 literacy and the use of healthcare services in Belgium. *Journal of epidemiology and community health*.
- 38 2016:jech-2015-206910.
- 39 52. DiMatteo MR, Lepper HS, Croghan TW. Depression is a risk factor for noncompliance with
- 40 medical treatment: meta-analysis of the effects of anxiety and depression on patient adherence.
- 41 *Archives of internal medicine*. 2000;160(14):2101-7.
- 42 53. Green JA, Mor MK, Shields AM, Sevic MA, Palevsky PM, Fine MJ, et al. Prevalence and
- 43 demographic and clinical associations of health literacy in patients on maintenance hemodialysis.
- 44 *Clinical Journal of the American Society of Nephrology*. 2011;6(6):1354-60.
- 45 54. Matsumoto M, Nakayama K. Development of the health literacy on social determinants of
- 46 health questionnaire in Japanese adults. *BMC Public Health*. 2017;17(1):30.
- 47 55. Shih SF, Liu CH, Liao LL, Osborne RH. Health literacy and the determinants of obesity: a
- 48 population-based survey of sixth grade school children in Taiwan. *BMC Public Health*. 2016;16:280.
- 49 56. Couture EM, Chouinard MC, Fortin M, Hudon C. The relationship between health literacy and
- 50 quality of life among frequent users of health care services: a cross-sectional study. *Health and quality of*
- 51 *life outcomes*. 2017;15(1):137.
- 52
- 53
- 54
- 55
- 56
- 57
- 58
- 59
- 60

1  
2  
3 57. Duong VT, Lin I-F, Sorensen K, Pelikan JM, Van Den Broucke S, Lin Y-C, et al. Health literacy in  
4 Taiwan: A population-based study. Asia Pacific Journal of Public Health. 2015;27(8):871-80.  
5  
6  
7  
8  
9  
10  
11  
12  
13  
14  
15  
16  
17  
18  
19  
20  
21  
22  
23  
24  
25  
26  
27  
28  
29  
30  
31  
32  
33  
34  
35  
36  
37  
38  
39  
40  
41  
42  
43  
44  
45  
46  
47  
48  
49  
50  
51  
52  
53  
54  
55  
56  
57  
58  
59  
60

For peer review only

Table 1: Descriptive statistics of the sample of multimorbid patients, N = 888.

| Variable                                             | mean <sup>‡</sup> | sd <sup>‡</sup> |
|------------------------------------------------------|-------------------|-----------------|
| Age                                                  | 72.93             | 12.00           |
| Health literacy score (577 missing values)           | 2.87              | 0.45            |
| Material deprivation score                           | 0.50              | 1.27            |
| Social deprivation score                             | 1.93              | 1.38            |
| Health deprivation score                             | 0.48              | 0.68            |
| Number of medical visits last year (1 missing value) | 12.90             | 8.70            |
| Number of hospitalisations (3 missing values)        | 0.54              | 0.99            |
| Number of chronic conditions (4 missing values)      | 7.20              | 2.86            |
| TBQ* score                                           | 26.77             | 18.60           |
| Number of specialists (141 missing values)           | 2.23              | 1.27            |
| Severity index                                       | 1.75              | 0.38            |
| Visual analogue scale (EQ5D3L)                       | 63.19             | 19.25           |
| Variable                                             | count             | prop            |
| <b>Sex</b>                                           |                   |                 |
| Male                                                 | 428               | 0.48            |
| Female                                               | 460               | 0.52            |
| <b>Educational level (1 missing value)</b>           |                   |                 |
| Primary                                              | 195               | 0.22            |
| Secondary                                            | 337               | 0.38            |
| Tertiary                                             | 355               | 0.40            |
| <b>Marital status</b>                                |                   |                 |
| Single                                               | 85                | 0.10            |
| Married                                              | 437               | 0.49            |
| Divorced                                             | 150               | 0.17            |
| Widowed                                              | 216               | 0.24            |
| <b>Number of drugs</b>                               |                   |                 |
| 0–4                                                  | 156               | 0.18            |
| 5–6                                                  | 212               | 0.24            |
| 7–9                                                  | 276               | 0.31            |
| ≥ 10                                                 | 244               | 0.27            |
| <b>Home Nurse (1 missing value)</b>                  |                   |                 |
| No                                                   | 798               | 0.90            |
| Yes                                                  | 89                | 0.10            |
| <b>Paramedical † (12 missing values)</b>             |                   |                 |
| No                                                   | 572               | 0.65            |
| Yes                                                  | 304               | 0.35            |

| <b>Homecare (1 missing value)</b> |     |      |
|-----------------------------------|-----|------|
| No                                | 755 | 0.85 |
| Yes                               | 132 | 0.15 |
| <b>EQ5D3L five dimensions</b>     |     |      |
| <b>Mobility</b>                   |     |      |
| No problems                       | 497 | 0.56 |
| Moderate problems                 | 386 | 0.43 |
| Severe problems                   | 5   | 0.01 |
| <b>Self-care</b>                  |     |      |
| No problems                       | 785 | 0.88 |
| Moderate problems                 | 92  | 0.10 |
| Severe problems                   | 11  | 0.01 |
| <b>Usual activities</b>           |     |      |
| No problems                       | 543 | 0.61 |
| Moderate problems                 | 328 | 0.37 |
| Severe problems                   | 17  | 0.02 |
| <b>Pain/discomfort</b>            |     |      |
| No problems                       | 211 | 0.24 |
| Moderate problems                 | 591 | 0.67 |
| Severe problems                   | 86  | 0.10 |
| <b>Anxiety/depression</b>         |     |      |
| No problems                       | 516 | 0.58 |
| Moderate problems                 | 329 | 0.37 |
| Severe problems                   | 43  | 0.05 |

\* TBQ: treatment burden questionnaire

† Paramedical includes physiotherapists/occupational therapists

‡ With multiple imputation

Table 2: Results of bivariate analyses with multiple imputation.

| <b>Independent variable</b>               | <b><math>\beta</math></b> | <b>95% CI</b> |         | <b>p-value</b> |
|-------------------------------------------|---------------------------|---------------|---------|----------------|
| Age                                       | 0.0053                    | 0.0027        | 0.0079  | 0.0001         |
| Sex                                       | -0.1008                   | -0.1643       | -0.0372 | 0.0019         |
| <b>Deprivation</b>                        |                           |               |         |                |
| Material deprivation                      | -0.0786                   | -0.1034       | -0.0537 | 0.0000         |
| Social deprivation                        | -0.0485                   | -0.0707       | -0.0263 | 0.0000         |
| Health deprivation                        | -0.1407                   | -0.1853       | -0.0961 | 0.0000         |
| <b>Educational level (ref: Primary)</b>   |                           |               |         |                |
| Secondary                                 | 0.0408                    | -0.0464       | 0.1280  | 0.3579         |
| Tertiary                                  | 0.0880                    | 0.0034        | 0.1726  | 0.0415         |
| <b>Number of medical visits last year</b> | -0.0023                   | -0.0060       | 0.0014  | 0.2285         |
| <b>Number of hospitalisations</b>         | -0.0283                   | -0.0598       | 0.0033  | 0.0789         |
| <b>Number of chronic conditions</b>       | 0.0042                    | -0.0076       | 0.0160  | 0.4820         |
| <b>Number of drugs (ref: 0–4)</b>         |                           |               |         |                |
| 5–6                                       | -0.0249                   | -0.1238       | 0.0741  | 0.6217         |
| 7–9                                       | 0.0025                    | -0.0926       | 0.0976  | 0.9588         |
| $\geq 10$                                 | -0.0601                   | -0.1579       | 0.0377  | 0.2279         |
| <b>TBQ* score</b>                         | -0.0071                   | -0.0086       | -0.0055 | 0.0000         |
| <b>Home nurse</b>                         | -0.1016                   | -0.2133       | 0.0100  | 0.0743         |
| <b>Paramedical †</b>                      | -0.0843                   | -0.1489       | -0.0198 | 0.0105         |
| <b>Homecare</b>                           | -0.0772                   | -0.1698       | 0.0153  | 0.1016         |
| <b>Number of specialists</b>              | -0.0284                   | -0.0544       | -0.0024 | 0.0322         |
| <b>Severity index</b>                     | -0.0457                   | -0.1258       | 0.0344  | 0.2630         |
| <b>Visual analogue scale (EQ5D3L)</b>     | 0.0048                    | 0.0032        | 0.0064  | 0.0000         |
| <b>EQ5D3L five dimensions</b>             |                           |               |         |                |
| Mobility (ref: No problems)               |                           |               |         |                |
| Moderate problems                         | -0.1507                   | -0.2131       | -0.0882 | 0.0000         |
| Severe problems                           | -0.1404                   | -0.5589       | 0.2781  | 0.5100         |
| Self-care (ref: No problems)              |                           |               |         |                |
| Moderate problems                         | -0.1965                   | -0.3045       | -0.0884 | 0.0004         |
| Severe problems                           | -0.1464                   | -0.4724       | 0.1795  | 0.3755         |
| Usual activities (ref: No problems)       |                           |               |         |                |
| Moderate problems                         | -0.1729                   | -0.2371       | -0.1086 | 0.0000         |
| Severe problems                           | -0.4167                   | -0.6521       | -0.1813 | 0.0006         |
| Pain/discomfort (ref: No problems)        |                           |               |         |                |
| Moderate problems                         | -0.1174                   | -0.1970       | -0.0378 | 0.0040         |
| Severe problems                           | -0.2760                   | -0.3961       | -0.1558 | 0.0000         |
| Anxiety/depression (ref: No problems)     |                           |               |         |                |
| Moderate problems                         | -0.2211                   | -0.2839       | -0.1584 | 0.0000         |



|                                     |         |         |         |        |
|-------------------------------------|---------|---------|---------|--------|
| Severe problems                     | -0.5390 | -0.6788 | -0.3991 | 0.0000 |
| <b>Marital status (ref: Single)</b> |         |         |         |        |
| Married                             | 0.1596  | 0.0484  | 0.2709  | 0.0050 |
| Divorced                            | 0.0947  | -0.0315 | 0.2208  | 0.1412 |
| Widowed                             | 0.1128  | -0.0057 | 0.2313  | 0.0619 |

For peer review only

Table 3: Results of multivariate analyses with multiple imputation.

| <b>Independent variables</b>              | <b><math>\beta</math></b> | <b>95% CI</b> |        | <b>p-value</b> |
|-------------------------------------------|---------------------------|---------------|--------|----------------|
| Age                                       | 0.0007                    | -0.0027       | 0.0041 | 0.6889         |
| Sex                                       | -0.0361                   | -0.1043       | 0.0320 | 0.2981         |
| <b>Deprivation</b>                        |                           |               |        |                |
| Material deprivation                      | -0.0245                   | -0.0533       | 0.0043 | 0.0954         |
| Social deprivation                        | -0.0235                   | -0.0480       | 0.0010 | 0.0606         |
| Health deprivation                        | 0.0221                    | -0.0364       | 0.0806 | 0.4577         |
| <b>Educational level (ref: Primary)</b>   |                           |               |        |                |
| Secondary                                 | 0.0070                    | -0.0763       | 0.0903 | 0.8688         |
| Tertiary                                  | 0.0560                    | -0.0284       | 0.1405 | 0.1929         |
| <b>Number of medical visits last year</b> |                           |               |        |                |
|                                           | 0.0009                    | -0.0029       | 0.0048 | 0.6302         |
| <b>Number of hospitalisations</b>         |                           |               |        |                |
|                                           | -0.0183                   | -0.0503       | 0.0136 | 0.2603         |
| <b>Number of chronic conditions</b>       |                           |               |        |                |
|                                           | 0.0096                    | -0.0032       | 0.0224 | 0.1399         |
| <b>Number of drugs (ref: 0–4)</b>         |                           |               |        |                |
| 5–6                                       | -0.0278                   | -0.1210       | 0.0653 | 0.5577         |
| 7–9                                       | 0.0276                    | -0.0647       | 0.1199 | 0.5568         |
| $\geq 10$                                 | 0.0110                    | -0.0905       | 0.1125 | 0.8318         |
| <b>TBQ* score</b>                         |                           |               |        |                |
| Nurse                                     | 0.0228                    | -0.1120       | 0.1577 | 0.7390         |
| Paramedical †                             | -0.0327                   | -0.0968       | 0.0314 | 0.3172         |
| <b>Homecare</b>                           |                           |               |        |                |
|                                           | 0.0057                    | -0.1069       | 0.1183 | 0.9205         |
| <b>Number of specialists</b>              |                           |               |        |                |
|                                           | -0.0235                   | -0.0513       | 0.0043 | 0.0967         |
| <b>Severity index</b>                     |                           |               |        |                |
|                                           | 0.0385                    | -0.0420       | 0.1190 | 0.3480         |
| <b>Visual analogue scale (EQ5D3L)</b>     |                           |               |        |                |
|                                           | 0.0000                    | -0.0019       | 0.0019 | 0.9722         |

| <b>EQ5D3L five dimensions</b>                |         |         |         |        |
|----------------------------------------------|---------|---------|---------|--------|
| <b>Mobility (ref: No problem)s</b>           |         |         |         |        |
| Moderate problems                            | -0.0864 | -0.1567 | -0.0161 | 0.0161 |
| Severe problems                              | 0.1663  | -0.3459 | 0.6786  | 0.5230 |
| <b>Self-care (ref: No problems)</b>          |         |         |         |        |
| Moderate problems                            | -0.0440 | -0.1552 | 0.0673  | 0.4379 |
| Severe problems                              | -0.0661 | -0.4830 | 0.3508  | 0.7532 |
| <b>Usual activities (ref: No problems)</b>   |         |         |         |        |
| Moderate problems                            | -0.0244 | -0.0998 | 0.0509  | 0.5242 |
| Severe problems                              | -0.1912 | -0.4453 | 0.0630  | 0.1402 |
| <b>Pain/discomfort (ref: No problems)</b>    |         |         |         |        |
| Moderate problems                            | -0.0033 | -0.0847 | 0.0780  | 0.9356 |
| Severe problems                              | 0.0073  | -0.1297 | 0.1444  | 0.9161 |
| <b>Anxiety/depression (ref: No problems)</b> |         |         |         |        |
| Moderate problems                            | -0.1288 | -0.1978 | -0.0598 | 0.0003 |
| Severe problems                              | -0.3426 | -0.4996 | -0.1857 | 0.0000 |
| <b>Marital status (ref: Single)</b>          |         |         |         |        |
| Married                                      | 0.0953  | -0.0146 | 0.2053  | 0.0890 |
| Divorced                                     | 0.1360  | 0.0122  | 0.2599  | 0.0314 |
| Widowed                                      | 0.0780  | -0.0477 | 0.2037  | 0.2233 |

1  
2  
3  
4  
5  
6  
7  
8  
9  
10  
11  
12  
13  
14  
15  
16  
17  
18  
19  
20  
21  
22  
23  
24  
25  
26  
27  
28  
29  
30  
31  
32  
33  
34  
35  
36  
37  
38  
39  
40  
41  
42  
43  
44  
45  
46  
47  
48  
49  
50  
51  
52  
53  
54  
55  
56  
57  
58  
59  
60

For peer review only

1  
2  
3  
4  
5  
6  
7  
8  
9  
10  
11  
12  
13  
14  
15  
16  
17  
18  
19  
20  
21  
22  
23  
24  
25  
26  
27  
28  
29  
30  
31  
32  
33  
34  
35  
36  
37  
38  
39  
40  
41  
42  
43  
44  
45  
46  
47  
48  
49  
50  
51  
52  
53  
54  
55  
56  
57  
58  
59  
60

For peer review only

1  
2  
3  
4  
5  
6  
7  
8  
9  
10  
11  
12  
13  
14  
15  
16  
17  
18  
19  
20  
21  
22  
23  
24  
25  
26  
27  
28  
29  
30  
31  
32  
33  
34  
35  
36  
37  
38  
39  
40  
41  
42  
43  
44  
45  
46  
47  
48  
49  
50  
51  
52  
53  
54  
55  
56  
57  
58  
59  
60

For peer review only

## STROBE Statement—checklist of items that should be included in reports of observational studies

|                              | Item No | Recommendation                                                                                                                                                                                                                                                                                                                                            |
|------------------------------|---------|-----------------------------------------------------------------------------------------------------------------------------------------------------------------------------------------------------------------------------------------------------------------------------------------------------------------------------------------------------------|
| <b>Title and abstract</b>    | 1       | (a) Indicate the study's design with a commonly used term in the title or the abstract<br><b>Title: Factors associated with health literacy in multimorbid patients in primary care: a cross-sectional study in Switzerland.</b><br>(b) Provide in the abstract an informative and balanced summary of what was done and what was found<br><b>p. 3 -4</b> |
| <b>Introduction</b>          |         |                                                                                                                                                                                                                                                                                                                                                           |
| Background/rationale         | 2       | Explain the scientific background and rationale for the investigation being reported<br><b>p.5</b>                                                                                                                                                                                                                                                        |
| Objectives                   | 3       | State specific objectives, including any prespecified hypotheses<br><b>pp. 6</b>                                                                                                                                                                                                                                                                          |
| <b>Methods</b>               |         |                                                                                                                                                                                                                                                                                                                                                           |
| Study design                 | 4       | Present key elements of study design early in the paper<br><b>p. 7</b>                                                                                                                                                                                                                                                                                    |
| Setting                      | 5       | Describe the setting, locations, and relevant dates, including periods of recruitment, exposure, follow-up, and data collection<br><b>p. 7</b>                                                                                                                                                                                                            |
| Participants                 | 6       | <i>Cross-sectional study</i> —Give the eligibility criteria, and the sources and methods of selection of participants<br><b>p.7</b>                                                                                                                                                                                                                       |
| Variables                    | 7       | Clearly define all outcomes, exposures, predictors, potential confounders, and effect modifiers. Give diagnostic criteria, if applicable<br><b>p. 7-10</b>                                                                                                                                                                                                |
| Data sources/<br>measurement | 8*      | For each variable of interest, give sources of data and details of methods of assessment (measurement). Describe comparability of assessment methods if there is more than one group<br><b>pp. 7-10</b>                                                                                                                                                   |
| Bias                         | 9       | Describe any efforts to address potential sources of bias<br><b>p. 7</b>                                                                                                                                                                                                                                                                                  |
| Study size                   | 10      | Explain how the study size was arrived at<br><b>p. 7</b>                                                                                                                                                                                                                                                                                                  |
| Quantitative variables       | 11      | Explain how quantitative variables were handled in the analyses. If applicable, describe which groupings were chosen and why<br><b>p. 8</b>                                                                                                                                                                                                               |
| Statistical methods          | 12      | (a) Describe all statistical methods, including those used to control for confounding<br><b>pp. 10</b><br>(b) Describe any methods used to examine subgroups and interactions<br><b>pp. 10</b><br>(c) Explain how missing data were addressed<br><b>p. 10</b><br>(d) Describe any sensitivity analyses<br><b>p. 10</b>                                    |

Continued on next page

**Results**

|                          |     |                                                                                                                                                                                                                                |
|--------------------------|-----|--------------------------------------------------------------------------------------------------------------------------------------------------------------------------------------------------------------------------------|
| Participants             | 13* | (a) Report numbers of individuals at each stage of study—eg numbers potentially eligible, examined for eligibility, confirmed eligible, included in the study, completing follow-up, and analysed<br><b>p. p.10</b>            |
|                          |     | (b) Give reasons for non-participation at each stage<br><b>p. 10</b>                                                                                                                                                           |
|                          |     | (c) Consider use of a flow diagram                                                                                                                                                                                             |
| Descriptive data         | 14* | (a) Give characteristics of study participants (eg demographic, clinical, social) and information on exposures and potential confounders<br><b>Table 1</b>                                                                     |
|                          |     | (b) Indicate number of participants with missing data for each variable of interest<br><b>Table 1 and p 11</b>                                                                                                                 |
| Outcome data             | 15* | <i>Cross-sectional study</i> —Report numbers of outcome events or summary measures<br><b>P 11</b>                                                                                                                              |
| Main results             | 16  | (a) Give unadjusted estimates and, if applicable, confounder-adjusted estimates and their precision (eg, 95% confidence interval). Make clear which confounders were adjusted for and why they were included<br><b>Table 1</b> |
|                          |     | (b) Report category boundaries when continuous variables were categorized                                                                                                                                                      |
|                          |     | (c) If relevant, consider translating estimates of relative risk into absolute risk for a meaningful time period                                                                                                               |
| Other analyses           | 17  | Report other analyses done—eg analyses of subgroups and interactions, and sensitivity analyses<br><b>Tables 2 and 3</b>                                                                                                        |
| <b>Discussion</b>        |     |                                                                                                                                                                                                                                |
| Key results              | 18  | Summarise key results with reference to study objectives<br><b>p. 13</b>                                                                                                                                                       |
| Limitations              | 19  | Discuss limitations of the study, taking into account sources of potential bias or imprecision. Discuss both direction and magnitude of any potential bias<br><b>p. 16</b>                                                     |
| Interpretation           | 20  | Give a cautious overall interpretation of results considering objectives, limitations, multiplicity of analyses, results from similar studies, and other relevant evidence<br><b>pp. 17</b>                                    |
| Generalisability         | 21  | Discuss the generalisability (external validity) of the study results                                                                                                                                                          |
| <b>Other information</b> |     |                                                                                                                                                                                                                                |
| Funding                  | 22  | Give the source of funding and the role of the funders for the present study and, if applicable, for the original study on which the present article is based<br><b>p. 18</b>                                                  |

\*Give information separately for cases and controls in case-control studies and, if applicable, for exposed and unexposed groups in cohort and cross-sectional studies.

**Note:** An Explanation and Elaboration article discusses each checklist item and gives methodological background and published examples of transparent reporting. The STROBE checklist is best used in conjunction with this article (freely available on the Web sites of PLoS Medicine at <http://www.plosmedicine.org/>, Annals of Internal Medicine at <http://www.annals.org/>, and Epidemiology at <http://www.epidem.com/>). Information on the STROBE Initiative is available at [www.strobe-statement.org](http://www.strobe-statement.org).
